# Supplementary material for: Marine origin of retroviruses in the early Palaeozoic Era
Source: PubMed Central journal article supplement (PMC5512871; doi:10.1038/ncomms13954), 2017-01-10
Supplement: ncomms13954-s1.pdf [file ncomms13954-s1.pdf]

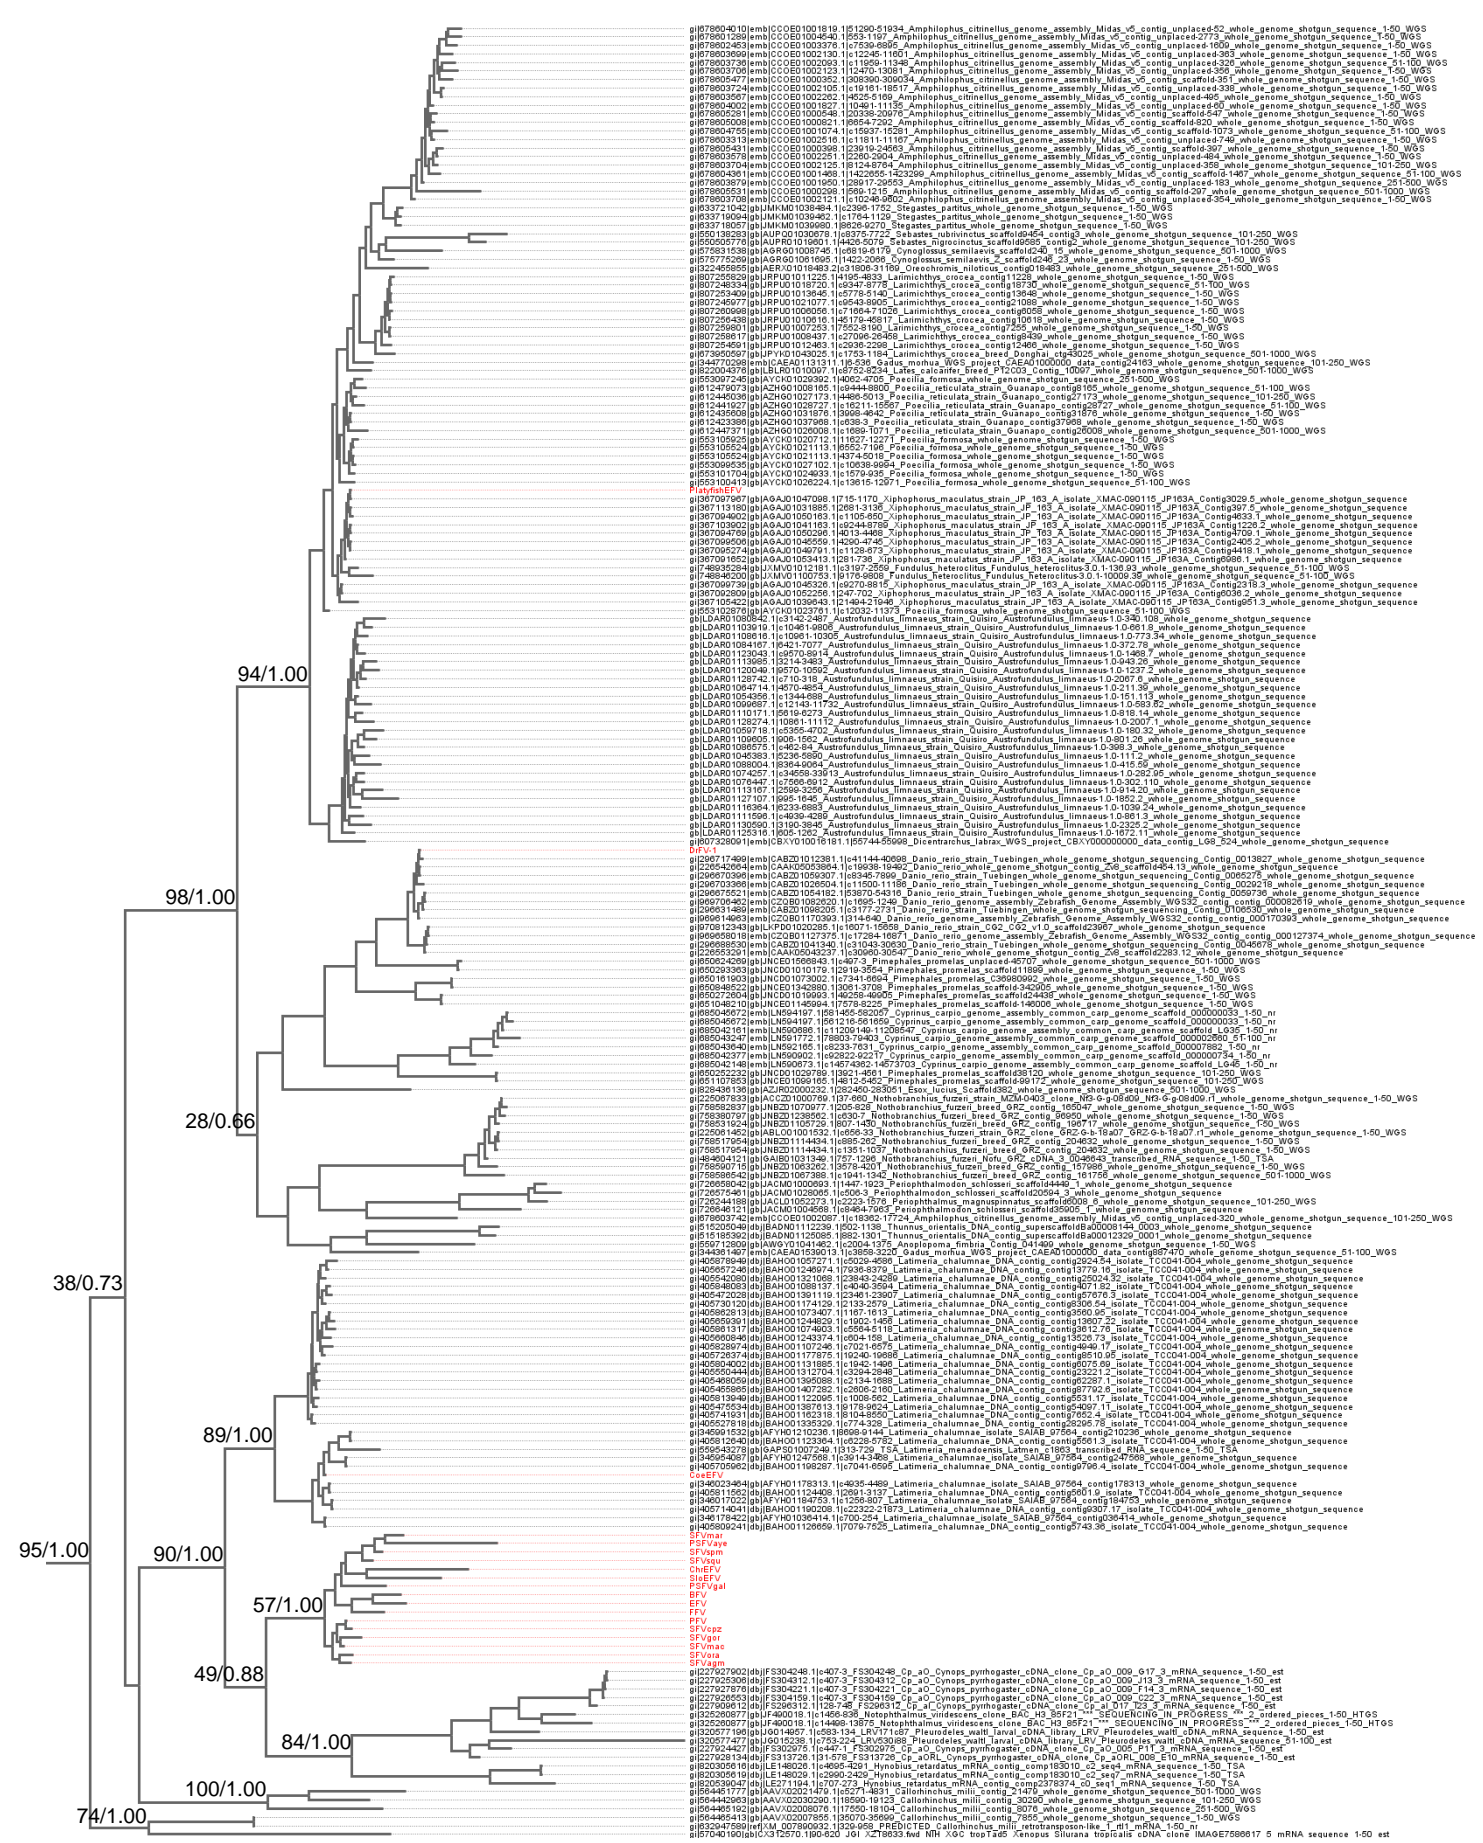

**Supplementary Figure 1 Phylogenetic relationship among FVs and FLERVs inferred from reverse transcriptase protein sequences.** The scale bar (black solid line, underneath the tree) shows genetic divergence of length 0.2 in units of amino-acid substitutions per site. Since both Bayesian maximum clade credibility and maximum likelihood trees have very similar topologies, only the Bayesian tree is shown. The numbers on nodes are bootstrap (1<sup>st</sup>) and Bayesian posterior probability (2<sup>nd</sup>) clade support values. Known mammalian FVs and fish FLERVs are labeled in red.

## Supplementary Figure 2

### NviFLERV-1 (JF490018: c17,626-8,434)

**5' -LTR**

1 **TG**TCACATGCTTTTTGCAAAGCCTTGCTTTTTTGCTTAGGTTGACCTGACTTTATAATTTTCCACCAGGCCTGTTTTAG 80

81 TTGCACACGGCCCTTAGCTGAGGCTCGGTTTGTGGCGCTTGCCTCTGCCCTAGATACATATGTGCAGACATGTTGTTT 160

161 CCCTTCACTCCTGCCCTAGTACAGTGCAAGGCCATTTAGTACGCTGAGATCGGCCATAGACAGATTTCTAGAAATAACA 240

241 GGCAGTGCAGYTTTTCCCATGCAAAGAAGCCCCTTATCACTAGGTGTTAGGCGGAACAAGGCAGAACGACTTTGCTCTT 320

321 CTCTGGTTCAAGATGCTGCTGCCAAAGCCTGCAGGCCTGATCCATMTCGCACACATGACAAAWACYTAGACTCAGGTATG 400

401 GGTTYGACCACACAGAGACATTTCCAACCTTACTCTTTAGTCTAAGTTCTGGGCAGGACTACTTTGTCTAACTATATTTT 480

481 AGACACTATACTCATTTTACTGTGATTTCTAGCATAATATAACATGTTAGTCATATTATACTTTTATATTTGTGCATTAG 560

561 CAATTGTATTATTTCTCTCTGTGATATGCATGGTAGTTGCAGTACAACAGATTTGTAGACTGAGATCATAGTCGTATAAT 640

641 AAAACCTATATAATTACATCTCCGTCTCTTTATCATTATTTTGGAGTGCATATAAGTCTCCAAACCGAAAAAGTGATCTTT 720

721 ACTTGCAAGACCACTTTCCCATGAGATCGGGAGGGGAGTCCTCTGTTCTAGGTTGCCCATATACTTGCTGAGGGTTGTTG 800

801 CTGTATAATTTTTACTAAGAATAAGAAGGCAAGTAGGGCACTGTAGCTAGCCGGACAAATTTGGGGTTTCTGTACTGATT 880

881 GGTCAGAACGCATTTAGTGGACACAAGAAGTACACAATTCCTTAGGCACAGTTTTGTACCCACAGAAACCATGCAACA 960

**PBS**

961 TGGCA**TACCCAACGTGG**TGGGGCTCTTATCTGCAGGTACACCTGAGTAGTACTTATATGCATGCATAATACCCTTACGCC 1040

1041 TTTAATATAGGAGAAGTCCTGGGTGTTTGAATAATTCCTCCGCGGTGTTTCCAGGCTAAACCGAACTCCGTGGTTTTTCAA 1120

1121 TGCATTGAAGTTTAAAAGGAAAATAAACCCAATATTGTGTTGCCTTTAAATTCTATTATTCTACATTCACATTACACATA 1200

1201 CACTAATCTTTTTATAGAAATTAGCGTTTTAAAACCTATCGTTTTTTTTGTAATTCAAA**ATGGCGGTGGCAGCAGCTGTTA** 1280

**Gag ORF**

M A V A A A V N

1281 ACATACAGCCCGCCGTTAGACAAGCTCTTTTCACTCACCTGACTAACCACCGTTTTTACACCCCTGGTGGTGTGCATGATC 1360

I Q P A V R Q A L F T H L T N H R F T P P G G V M I

1361 TTTGCAGTCGAAGCTAGCGATCAATATCGCTGCAAATTTTATTACTCATGGGTGGAGTTTCCGGCTGTT--ACCACAAAG 1440

F A V E A S D Q Y R C K F Y Y S W V E F P A V ? P Q R

1441 ATACGCTCCATATCTATGGCTTGAAGTACTGTTATCAGTGTGGAATCATAACGCGTGGTTTTGGTGTTC AATTACCCATA 1520

Y A P Y L W L E V L L S V W N H N A W F G V Q L P H T

1521 CTCTAAGGCCGATAAGACTAGGACCTTTAATAATCCTGGTGCAACATGGCCCACTCTCGCTGGTTTTACACCCCTATGTC 1600

L R P I R L G P L N N P G A T W P T L A G F T P Y V

1601 GATACTGCAAATAGAACGCGAGGTGAAATGGTAGCATTGTATGAACAAGTCTGTGCAGATGTATTGGATCTTGGTGC AATA 1680

D T A N R T R G E M V A L Y E Q V C Q M Y W I L V Q Y

1681 TATGACACGGACTTTTATCAGTGCTCCTGGACTGCCAGGTGAGCCACAAGCACCGGCCACGGCCAAAGCATTGGACCCG 1760

M T R T F I S A P G L P G Q P Q A P A H G Q S I G P V

1761 TGTTGTAAATCTCTTATGGGCAAAAAGCCCCTCACCAGGGAGGAATATCCCTACTGGTTAGCAGAGAAAATACCGCAA 1840

V V N S L M G K K P V T R E E Y P Y W L A E K I P Q

1841 TTGGAAGCGGTATTACCACAATGTAATCCTCAAGACAGGCACTGTATACTAACGATGTGCCTGCCCAAGGAATTGTTCC 1920

L E A V L P Q C N P Q D R H C I L T M C L P Q G I V P

1921 TACACAAGCTGAATGGAGCGAGGCATTTGCGGCTTTGTACATTATCGCTCACGGGGAACCATCTTTGCAGTGTGCCAG 2000

T Q A E W S E A F A A L Y I I A H G E P S F A V L P E

2001 AGGTTTTGAAACAAATTCAAACCAACACGGAGCAGCTGCAGCCCTAGATTTAGGGATGCGCCCTCTGGCAAACCTTTCCC 2080

V L K Q I Q N Q H G A A A A L D L G M R P L A N F P

2081 GTGGTTTCCCAGATGATTTTGAGAAACATTAAGGACGAAGCTGCGGCCTTGATCTTGCGCCAACAACCTGATGGCGTTACC 2160

V V S Q M I L R N I K D E A A A L I L R Q Q L M A L P

2161 GGTTATGCAAAGAGAGGTGGCTTTACCCGGTATAATTGCCGATACCTATCAGGCGATGGGACGTAACAATTTAGGTAAC 2240

V M Q R E V A L P G I I A D T Y Q A M G R N N L G N C

2241 GTCCGCCAAAACCTCTGCCGGAACAACCTAAAGAGAAGCCGGCTGGAAAGCCCCATGACACTTCTAAAAAGACTTGGGTA 2320

P P K T L P E Q P K E K P A G K P H D T S K K T W V

2321 CAGACTAAAAATAAGCAGAACAACAGGGGAAGAAAACCTGAGCAATCTCAGTCCTCTGAGAGATCTGAAAAACAGTATGA 2400

Q T K N K Q N K Q G K K T E Q S Q S S E R S E K Q Y E

2401 ACTGCGCGACCGCTCTAAAGTGAAGCCTCCAGACAGGTATCAGGGTACTGATACTCGTTCTTCTCGTTCCCCACAGGAAC 2480

L R D R S K V K P P D R Y Q G T D T R S S R S P Q E P

2481 CGTCCACTTACAGGGAGGCCACAGCGATCAGAAGGCAGATACGACGAACAAACGCGAAGGCGCTCTGGTCTTGACTAA 2560

S T S Q G G P Q R S E G R Y D E Q T R R R S G L D \*

2561 GACCAAAAAGTCAAGCAAGAACAGCAAAGTCCAAAGCAGAAACCGCAATTTCAATCAAAGAAAGTAGCTGCATTGACTGA 2640

D Q K V K Q E Q Q S P K Q K P Q F Q S K K V A A L T E

2641 ACACTACGCCTCAAGTACTGAGGACTGATAGCGGGGAACCGCTGGGCACTGGCGGTTCTGGACAGCGCGGCAGAGATT 2720

H Y A S S T E D T D S G E P L G T G G S G Q R G R D Y

T P Q V L R T L I A G N R W A L A V L D S A A E I

2721 ACCGTTATACTTTGGAATCTACAGGACATTCTGGCAGCGACTTCAACTGAACAGTTTGTGCGGTTGAAACTGCAGATAC 2800

R Y T L E S T G H S G S D F N \*

T V I L W N L Q D I L A A T S T E Q F V A V E T A D T

2801 ACATGTATTACCACCAGACAGGATTTATAATGTCAAATCCAAATTGAGGGTGATATTATACTTCCATCCAAGCTATTT 2880

H V L P P D R I Y N V K I Q I E G D I I R S I Q A I F

2881 TTTGGGACAATTTTACATCTACTTATGACATTCTTTTAGCTGAGGCAGACTGGCCTCCGGACTTTGTACGCTCCGCACCA 2960

W D N F T S T Y D I L L A E A D W P P D F V R S A P

2961 TGTGGTGAGGACGTCATTCTCCCTGCTTTTTCTTCGCTTGTCCCTGACAATGTTAAATA-GCTTATGCGGCTGATTGGGC 3040

C G E D V I L P A F S S L V P D N V K ? A Y A A D W A

Pol ORF (uncertain starting site) →

Gag ORF end ←

3041 TTTGGCACTGGCCCCAGCACTCTATCGCAATGAATGCGGCTGGGATGAAGAATCACCTTCTCACGTAATCCCTAAACGTA 3120  
L A L A P A L Y R N E C G W D E E S P S H V I P K R T

3121 CTAGCCCGCAAGTGCAACCTCAATATCCTATCAAACGTGAAGCAAAGCTTCGGTCAAGGAAATACTCACTCATCTTGAG 3200  
S P Q V Q P Q Y P I K R E A K A S V K E I L T H L E

3201 AATCAGGATGTCATTGAATCATGTACTTCAGATATGAACAATCCTCTTTTTCTGTGGCCAAACCTGACCATTTCATATCA 3280  
N Q D V I E S C T S D M N N P L F P V A K P D H S Y H

3281 CATAGTCTTAGATTATAGACACCTGAACAGTCACACACGTTTCATTTGCGATCCACAATACACACAGTTCAACTCTTGTA 3360  
I V L D Y R H L N S H T R S F A I H N T H S S T L V N

3361 ACAATCTGACTCGAAAAAATACAAAACCACGTTGGGCATTTCCAACCTGATTTTTTACACAAAATCTAGCACCTGAAAGC 3440  
**Reverse transcriptase domain**  
N L T R K K Y K T T L G I S N \* F F T Q N L A P E S

3441 CAAGACTGGTCCACATTTACCTGTCTCGGTATCCAATACAAATTTTGGCGTCTCCCAATGGGGTATAAGAATAGCCTGGG 3520  
Q D W S T F T C L G I Q Y K F W R L P M G Y K N S L G

3521 AGTGTGGCGGTGCGTATTATCGAATTACTGCAGTTAGTAGACCCTGACGCGGTGTCGTACATTGACTATATTTACGTCA 3600  
V F A V R I I E L L Q L V D P D A V S Y I D Y I Y V T

3601 CGGACGATGAAATGCAACAACATTTGGCCCGGGTGGATCGCATAATCATAATTTTTCTGCCTCCGGCTACAAAATAAAC 3680  
D D E M Q Q H L A R V D R I I I H F S A S G Y K I N

3681 TTCAAAAATCTAAAATTGCTTTCTTTAGTGTCTGTTTCTGGGATACAAACTCAACAACGAGGGCAAGAGCTTAGCTCC 3760  
F K K S K I A F F S V L F L G Y K L N N E G K S L A P

3761 TCATTTTCTTGAGCGCTGCGCAGTGCTTCAGGATCCAAACACGCTTACAAAACCTTTCATTCTTTGTTGAACTTTCTCAACT 3840  
H F L E R C A V L Q D P N T L T K L H S L L N F L N F

3841 TTGGACGTAGATACATAACCAGAATATGCACAGAGAATAAAACCTCTCTACAGTTTGATTGAGCATGACTACTGTTTAAACA 3920  
G R R Y I P E Y A Q R I K P L Y S L I E H D Y C L T

3921 CACTGGACTGATGCGCACACTGACATTCTCCGTTCCCTGCAACGAGATTTGCTGGAACTTTAACTTACACACACGTGA 4000  
H W T D A H T D I L R S L Q R D L L E L \* H L H T R D

4001 CAATACCACAAACCTTGAGATCCGCGTCTACCAAGCGCGACCGGATTCATTACATGACTTTCAATGAAGGGGACACGG 4080  
N T T N L E I R V S P S A T G F T Y M T F N E G D T V

4081 TCCCATGGCATATAAATCGCATTTATATTCATCTGTTGAGATGCGTTTTGCCTCTACTGATTTTTTTTTTTACTGCGGTG 4160  
P M A Y K S H L Y S S V E M R F A S T D F F F T A V

4161 CAGATGGCGATCCTCAAGGAACGCCGCTTGCACAAGGAAAACGCATTATTGTGGTGACACCGGTACCAGCCCTCGAAGC 4240  
Q M A I L K E R P L A Q G K R I I V V T P V P A L E A

4241 TGTCACCAAGGCTAGTGTCCCAAATGCAAAGCCCTGCATCCGAGATGGATAACAGTGGGCAGCGTCACTGACTTCAGTTG 4320  
V T K A S V P N A K A L H P R W I Q W A A S L T S V D

4321 ACGTAGACTTTGTCTTTGACACTACACTACAATCTCAAGAATTCTTGAATACGAAGAAATCTATCCGCAACGTCCTTCG 4400  
V D F V F D T T L Q S Q E F L Q Y E E I Y P Q R P S

4401 GTTTTGCCTCTTGATCAGTATCAACAAATCATTTACATTGACGGGAGTGCTCAACCGGCCATTGGTTCAAAGCAGGCGTA 4480  
V L P L D Q Y Q Q I I Y I D G S A Q P A I G S K Q A Y

4481 TTCAGCGGCTTGTCTACAATCACTGGCGTAATGAAGGATGGTGTCTTTCATCCTACAAAAACAGTACAATGTCTCTAG 4560  
S A A C S T I T G V M K D G V F H P T K T R T M S L G

4561 GAGACTGTACTACACAGCTGGCTGAGCTCACATCTTTAGTCCTTGCACTTACACATGCAAAACAAGACATTCTGACTC 4640  
D C T T Q L A E L T S L V L A L T H A K Q D I L T L

4641 ATCATTTCAGACTCTCACTATTGTGTTTCGCGCCTATA-TGAGGACCTACATTACTGGCGTTTTGAATAATTACAGGGATTC 4720  
**RNaseH domain**  
I I S D S H Y C V R A Y ? E D L H Y W R L N N Y R D S

4721 GAAGGGCAACATAATAAAGCACAAAACGCTTTGGGTACAGGTGGCTACCTTTAAAGGCCAGCTACCGCAGACTCATGTAG 4800  
K G N I I K H K T L W V Q V A T F K G Q L P Q T H V V

4801 TACATACATTGGGTCATCAACGTGTGGGCTCGCACGTTGTAGGAAATACTTTAGCAGCTACTGCGGCCAAGTCTGCAGTT 4880  
H T L G H Q R V G S H V V G N T L A A T A A K S A V

4881 TCTCTGGGTACTGTTGCTGCAATTACACGTTCTCAAACGAAGATAGACGCTGATATCTTGGCGGCTGTCCATGCATCTCA 4960  
S L G T V A A I T R S Q T K I D A D I L A A V H A S Q

4961 GGAAGGAATCCCTCCCCAAAAGGCTTTCCATTAAATATACATATTGCTTAAGCTATCAAAACATTGCTTTTGTACAAA 5040  
E G I P P P K G F P I K Y T Y C L S Y Q N I A F V Q I

5041 TACCTGGGGTTGGAGATAGAACGCTCCCCAATCAAGATCGCAGATTAGCTTTAATTAAGGCAGCCCACGAAGGTGTGGCT 5120  
P G V G D R T L P N Q D R R L A L I K A A H E G V A

5121 TCTGCTCATGTGGGTGTCCAGGCTACCATCACTTTGCTACAGCAGCAATACTGGTGGAAGGGCTGTACAAAGAAGCTAG 5200  
S A H V G V Q A T I T L L Q Q Q Y W W K G L Y K E A R

5201 GAAATATGTTCTCGAATGTGACATTTGCCAGCAAATTTAAACCTCCACCATAGTCAGACCACCTCAAACCTCACTCTTCA 5280  
K Y V L E C D I C Q Q I K T S T I V R P P Q T S L F I

5281 TTTAGATAAACCTTTGGTTGTGCTTACCTTGACCGTTGTGGCCCTTTGTCTTCTGATACTGCATACAAGTATATCTTG 5360  
S D K P F G C A Y L D R C G P L S S D T A Y K Y I L

5361 GTCGCAGTGGATTCTTGTTCAGATTCTCTGGGTGTGGCCACAGCGCTCGGCTGACGCTCGTACAGTTATTAAAGATTT 5440  
V A V D S C S R F L W V W P Q R S A D A R T V I K D L

5441 GCGAGTTTTATC-GGAACGTATGCATGTCGTACATTCCATGCAGACCAAGGCCCGGCATTGCTTCTAAAGCGTACCGGG 5520  
**Integrase core domain**  
R V L ? G T Y A C R T F H A D Q G P A F A S K A Y R E

5521 **cPPT**  
AGGCTCTAGAGTCCCTGGGGGTACAAATACATTACAGCTCACCTACAGACCCGAGGGTAATAGTGTAGTGGAGAGAATG 5600  
A L E S L G V Q I H Y S S P Y R P E G N S V V E R M

5601 AACCGTGACTTAAAGCAATCCTTAACGTTGCGAGTTATAGGTATGGGACGGGACTGGCTGCACCACCTGTATGGGGTCCA 5680  
N R D L K Q S L T L R V I G M G R D W L H H L Y G V Q

5681 GATGGGTCTGAACAACCTTGCCAGACAGTCTCTGTGTGGCCGAACCTCTTATGATGTCTTATTTCGGCCAATCCATGTTG 5760

M G L N N L P R Q S L C G R T P Y D V L F G Q S M F V  
 5761 TGCCAGACCTTGACGGTCTTACTGTTGTGTCGGCGGACACATCATATGATCTCGATAACAGATTCGTGCTGACGTCCTG 5840  
 P D L D G L T V V S A D T S Y D L D N R F V L T S L  
 5841 GCG-CCCAGTCTGAAAAGAAACCCGCTGCTGCTGGTGAAGTCTCCTTCCATTCTGTGGGCTGGCTTCCGAAGAAAGG 5920  
 A ? Q S E K K P A A A G E T A P S I P V G W L P K K G  
 5921 AGACCTGGTCCGTGAGAAGATTGCAGCTAAGAAGGAGTTTGGACCATCCTATCGTTGTCCAGTACCAGTTCTGGGGATAT 6000  
 D L V R E K I A A K K E F G P S Y R C P V P V L G I S  
 6001 CCGGAACTCGAACGGTATCCTGCCACCACTTCCAGGTTTCGACTGATCCCCGTTTTGTTTTCTTCCCATCCTGGGGGGGTT 6080  
 G T R T V I L P P L P G S T D P R F V S S H P G G V  
 6081 ACTACTTACTCTATTGGTAAATTATGTCAAAAATGGCTGAAAGATTCCACTTCATCAGCAGTGAAAGACCATATCGCAAC 6160  
 T T Y S I G K L C Q K W L K D S T S S A V K D H I A T  
**Pol ORF end** ← → **Env ORF (uncertain starting site)**  
 6161 GTTGTCTGATAC-TAGTGATTTTAATGACATTATACTTGGTCCACGTACACCACGTTTCTAAACGTTTTGCTTCCATTGCT 6240  
 L S D ? \*  
 L I ? S D F N D I I L G P R T P R S K R F A S I A  
 6241 TATATAATTTACAATGAAATATCAAAGGTTTCTAAATTAGATGCTGCAATACGTTTACATCAAATTGATGAAGACAACAT 6320  
 Y I I Y N E I S K V S K L D A A I R L H Q I D E D N M  
 6321 GAATAAAGTTTTAGGTGTGGTTGATAATAGTATCAACACACTGTCTTACGTATTTATGATTTGGAAAATGTATTTTCTT 6400  
 N K V L G V V D N S I N T L S S R I Y D L E N V F S S  
 6401 CTGTTATTGATATTGTGCAGTCTGATGTATCCACATTTTATCATGTCCAGACACAATTGAGGCCCATTTTATGATTTTACAGT 6480  
 V I D I V Q S D V S T F Y H V Q T Q L R P I L D F S  
 6481 TGGACCCTTCAAACCTCTGAAAAGTGGTAAAGTCCCGTGGTCATACTTAAATGTTTCATCATTGTTTTTACGTTTTAACTT 6560  
 W T L Q T L K S G K V P W S Y L N V S S L F S R F N L  
 6561 GACACGCTCACAACGATTAATGGCTCAAAGAGTGCCACTTATACTATGTTACATTTAGAAAAGTTAGAACGTTTACCTT 6640  
 T R S Q R L M A Q K S A T Y T M L H L E K L E R L P F  
 6641 TTAAGTCTCTGAAATGTCCTCCACAGTCTGGTTAATCCACGGGTTATTACTCTTCCCATTGCCACATTTAAATTCAG 6720  
 T V S E M S S T V W L I H G V I T L P I A T F K F T  
 6721 GACTGTATGAAATACATTCCTTCCAGTCTGCACGAAGATAGCTGACTCCTACATTCATGAAAAATGGTTTCTTCCCTTT 6800  
 D C M K Y I P F R S C T K I A D S Y I H E K W F L P F  
 6801 CCTATACAGATGCTACAGTGGAGAGAAAGAGGTTTTTCTCTCAGTGCGGGACTGCGACTCCTCTTTGGGGCACTCGCTTG 6880  
 L Y R C Y S G E K E V F L S V R D C D S S L G H S L V  
 6881 TCTGCCAAGAAATCACAGTTCACGGTGCATGTACTGCTTCCACACCAAATTTGCTCTGCGCTTTGCGTGGGCTTCCAGTT 6960  
 C Q E I T V H G A C T A S T P N L S C A L R G L P V  
 6961 TCCTTTATTGCAGGCAAACCTCATGTTTTAGTGAATGGCAGTTATGTTATGCTGAACGAAATGGATTGCTGTGGTATGAT 7040  
 S F I A G K T H V L V N G S Y V M L N E M D C C G M I

7041 AGCTGGAATTCGGTATATTGTCACAGTTTCCCATCCGGTAACTTGTGCGGAGTCCTTATCTTTCTCCCTCCCACAAGA 7120  
A G I P Y I V T V S H P V T C C G V L I F P P S H K T

7121 CGCTGGAAAGCTCTATTTGGCCTCACATTCCAACCTCAGAATTACAATTTTGATAAGCTGAGCAGGCTCAAAGCGTTACTG 7200  
L E S S I W P H I P T Q N Y N F D K L S R L K A L L

7201 TTTCATAAAAAAGTTTACTTGACATCTGCTTGTGAGACCTTCAACTTGCAGGTGGCGACAACCTCCAGTGAAATACAGTC 7280  
F H K K V Y L T S A C E T F N L Q V A T T S S E I Q S

7281 GCTGTTGAACACTAATCTCCCTATACATTTTTGTGAACTCCTTCATACTATTTCTAATGCTTCGTCCAAGACCGGCCTTG 7360  
L L N T N L P I H F C E L L H T I S N A S S K T G L V

7361 TACACGTTTTTAAGGTGGTGGACTCGGGCGTGGTTTTCGACCTTTAAAGCAGTGGTAGGTATTATAACCAGCTGCTATCCAT 7440  
H V F K V V D S G V V S T F K A V V G I I P A A I H

7441 TCCCTATTTTCGAGTTTCTTTGGGTTTGTCCCAATACTTCTCTGCGCTATAGCTGCAGTGGTGGTTCTGTTCCTTTTTCT 7520  
S L F S S F F G F V P I L L C A I A A V V V L F L F L

7521 CCGTTATGGATGCCCGACTCGGAAACGTCCTGCGTCAGGCCTTGCTCATGAAATGCCGCCAGTGACTGCTTGAATCTGCTT 7600  
R Y G C P T R K R P A S G L A H E M P P V T A \*  
L L D L L

7601 GAGATAGCAGTTGTGCTGGACCTTGGCCAACACTGGTCTCTGACATTCCGCTCTCAATGGTACAACCTGTATCATTCCGGT 7680  
E I A V V L D L G Q H W S L T F R S Q W Y N C I I P V

7681 CTTACGTTGCCTCTGGTGTCCCTTTCAATTGCTGATTGATGTCTGCTTGGCTCAACATCTGTCTTTTCTTATGGACTTGG 7760  
L R C L W C P F Q L L I D V C L A Q H L S F L M D L E

7761 AGTTACTAATGGACCCACTGAGGGCCATTGTCACGGGTGTCCACGTCGATTAAGATTGATTCAAGAGTCTACAATTGAG 7840  
L L M D P L R A H C H G C P R R L R L I Q E S T I E

7841 CTCCCTCGTTTCTATCTCAGGTGCGGACGCACAGGAAATGAGCTCTGCGGACATCCATGCCACGTTGACTGGCATCTT 7920  
L P S F P I S G A D A Q E M S S A D I H A T L T G I L

7921 GGATGTTCTCGTTCCGCTCTTAGATTTCGAGCTGTCACAACCTGCTACCTACCGCTGCTCAACTCTGTTTCTCTGCTATGC 8000  
D V L V P L L D S S C H N C Y L P L L N S V L S A M Q

8001 AGCCCGTGGATGCTGCTTCTTCAACTGGTAACCTGGATCCTTTGGAAGTCTTTCTGGGAACCCTTGACACTCTCTAAATCT 8080  
P V D A A S S T G N L D P L E V F L G T L D T L \*  
Acc ORF end

8081 GAACTTTTTGACAAAATTGTCCATTTTTTCTTAACGTGACGTCTTTTTCATTTTTTACTATTTTCGACCTATTTTTATTA 8160  
PPT 3'-LTR

8161 TGATCATTAGCTTCTGAGCTAATATATGTCTTCTCTCTCTGGGTCTACAACCGATCTTAGGGGGGTGACACATGCTTTT 8240

8241 TGCAAAAACCTTGCTTTTCTGCTTAGGTTGGCCTGACTTTATAATTTTCCACCAGGCCCGTTTAAATTGCAGACGGCCCT 8320

8321 TATTTGAGGCTCGGTTTGTGGCGCTTGCCTCTGCCCTAGATACATATGTGCAGACATGTTGTTTCCCTTCACTCCTGC 8400

8401 CCTAGTACAGTGCAAGGCCATTTAGTACGCTGAGATCGGCCATAGACAGGTTTCTAGACATAACACGGCAGTGCAGCTTT 8480

8481 TCCCATGCAAAGAAGCCCCTTACCCTAGGTGTTAGGCGCAACAAGGCAGAATGACTTTGCTTCTCCGGTGCTAGAC 8560

8561 AGACGATCCTCGATGCTGCTGCCAAAGCCTGCAGGCCTGATCCATCTCGCACACATGACAAAAACCTAGACTCAGGTATG 8640  
8641 GGTTTGACCACACAGAGACATTTCCAACCTTACTCTTTAGTCTAAGTTCTAGGCAGGACTACTTTGTCTAACTATATTTT 8720  
8721 AGACACTATACTCATTTTATTGTGATTTCTAGCATATTATAACATGTTAGTCATATTATCCTTTTATGTTTGTGCATTAG 8800  
8801 CGATTGTATTATTTCTCTCTGTGATATGCATGGTAGTTGCAGTACAACAGATTCGTAGACTGAGATCATAGTCGTATAAT 8880  
8881 AAAACCTATATAACTATATCTCCGTCTCTTTATCATTATTGTGAGTGCATATAAGTCTCCAAACCGAAAGGGTGATCTTT 8960  
8961 ACTTGCAAGACCACTTTCCCATGAGATCGGGAGGGGAGTCCTCTGTTCTAGGTTGCCCATATAATTGCTGAGGATTGTTG 9040  
9041 CTGTATAATTTTTTACTAAGAATAAGAAGGCAAGAAGGGCACTGTAGCTAGCCGGACAAATTTGGGGGTTTTGTACTGAT 9120  
9121 TGGTCTGGAACGCATTTTCGTGGACACAAGAAGTACACAATTCCCCAGGCACAGTTTTGTACCCACAGAAACCACGCAACA 9200



# NviFLERV-2 (JF490018: c4,391-1)

5'-truncated 5'-LTR

1 TGCTGCCCCAGCTGCTAGGCCTGATCACCATTGCACGAATGCAAACCCCTAATAACCAGGTGAGGAGTTCTGTGCACAA 80  
81 CAATGACATTTCTACTTTATAATTTCTAGCTTAGTCCTTGGCAAGTTTTACTTTAGCCTAGCTATAAAATAGGCACTAT 160  
161 AATTGTTTACTGACAGATATACAGTAGCAGTGTTATAACAATAATATGGTGGTAACACTAGCTTTCTTTGTATGTGTATTT 240  
241 TCAGTCATTATCTTTCTGGCTGGTATTTGCGTGGTAATCTCTATGCAACAGATCCGTAGAGCTAGACAATATGTACTATA 320  
321 ATAAACACTATATTGCTATTTCTAAGACTCTGTGTTACTTATTATTACGAGTGTGTATGAGTTCTAATTCTCTAGTCTA 400  
401 ACACGAAAAGGTGATTACTGCTTGCAAAGACCACGTTTCTGAGACCGAAAGGGAGTCCTCTGTTCTAAGTACGCCAGA 480  
481 CACTTGTGCGAGTGTTTCATTCTATAATTATTACTATAACCAAAAAGACAAGTGGGGTACTGTAGCTAGCTGGACAAAGTG 560  
561 GGTGGCGGTCACCGATTGGTAAGGTTACGCATTTCCCTATTACAAAAGTACGCAAACCCAGCACAGTTCTGAACTG 640  
641 TCAGAACTCTGTAA**CATGGCGCCCCAA**CCGTGATGGGTCTCTTATCCCGCAAGTACACCTGAGTAGTACTCGTATGCAC 720  
721 TCATAATACCTTTACGCCGTATATTGGAGACGTCCTCTGGTGTTTAGGAAATAATTAATTAATTCCTCCGCGGTGTTT 800  
801 GCTGCGACCGAACACGCGGTTTTTCGATGCGCATTGAAGTTTAAAAGGAAACCCACTTTTGTATTGCCTTTTGAATCT 880  
881 ATAGATTTACCTATTATAGTCTTTTCATACGTTTGTACACTATTTAGACATATATTGTACCACACACGAACTTACATTT 960  
961 CTAAGTGCACACATTTTCTGAAAAACAAA**ATGGTGGACGCGGAAGAAAACGAAGAAGCCGTGGCTATTCACGCGGCAGT** 1040  
M V D A E E N E E A V A I H A A V  
1041 TAGAGAAGCGGTTACACACACTTACTACGCCATCACTTACAGACGCTGGTGGTATATTAATTTTTGTTGTGGAAGCTA 1120  
R E A V H T H L L R H H F T D A G G I L I F V V E A S  
1121 GCGCTGAAAATCCCATGGAATACTTTTATTCTGGGTGGAGTTCCCGGCAGTCGATCAAGTTACGGGACATTTCCACACT 1200  
A E N P M E Y F Y S W V E F P A V D Q V T G H F H T  
1201 TACACAATTCAGCCCTTCTAATGTTTACGTTCCCTATCAACGTGTCGAGGTACCGTTAACATACTGGAACCACCGAAC 1280  
Y T I P A L P N V Y V P Y Q R V E V P L T Y W N H R T  
1281 GTGGTTTGGGAGCGAAATTCGCACCCCGCCGAGATTGTTGACTCGGACCTTTGGGTGTGCAGGGGGGGCTCATTGGC 1360  
W F G S E I P H P A E I V R L G P L G V Q G G A H W P  
1361 CAGCGCTTGCAAACACTACTCCTTATACTGAGTATAATGACCTCGATAAAAATGACGTAATTAATCTTTACGAACAGATC 1440  
A L A N Y T P Y T E Y N D L D K N D V I N L Y E Q I  
1441 ACCGGGCTTTACCGACTTTGGTGCCTTTACATCGCGCACTTTGGTTGCAGTACCGGTTACGCCTGGTGTTCACATAT 1520  
T G L Y R T L V R F T S R T L V A V P V Q P G V P H I  
1521 CGTTCAGCCACAACACGGGCAGATAATTGGACCCGTGGTGGTGAACGCACTCATGGGTAAAAACCGACAGTACGGGACG 1600  
V Q P Q H G Q I I G P V V V N A L M G K K P T V R D D  
1601 ACTATCCCTTCTGGCTGGCTGAAAAATACCACAGCTAGAAGGCGTCTTTACCCATTCCACCCACAGGACAGGCACCGT 1680  
Y P F W L A E K I P Q L E G V F T H S T P Q D R H R  
1681 ATTTTAACCATATGCCTGCCCAAGGTATGGTCCCACGATTCGTGAATGCAATCTTTGGAGTGAAGCGTTTCGAGCACT 1760  
I L T I C L P Q G M V P T I R E C N S W S E A F A A L  
1761 GTACGTCATTGCTGTGGGTTGCCCCCATAGGTGCCATTCTGAAGTCTTAAAACAAATACAGGGCATTTCATGGTGCAG 1840

Y V I A V G S P S I G A I P E V L K Q I Q G I H G A A  
 1841 CCGCAGCCCTGGATTTAGGCATGCGCCTGATGGGCAACTTTGAGATGATTTACATATAGTCATTCAAAATATCAAAGGC 1920  
 A A L D L G M R L M G N F E M I S H I V I Q N I K G  
 1921 GAAGCTGCAGCATTAAATGGTAGAAAGCCGTATGATGGCTTTGCCTGTACAAGAAAGAGAAGCGGCATTACCAGGTATTAT 2000  
 E A A A L M V E S R M M A L P V Q E R E A A L P G I I  
 2001 TGCTCGGGTCTATAAGACACTGGGTGTAATAATTTAGGTAATAAGCCACTCAAACCCACCGACTTGGCAAAAGACAAGC 2080  
 A R V Y K T L G R N N L G N K P L K P T D L A K D K Q  
 2081 AGGTAACAAAACCCAGGAGACATTTAAAAAGTCCTGGGTGCAAAATAAACCAACCAAAACAAAAGAAGGAAACGCGGACG 2160  
 V T K P Q E T F K K S W V Q N K Q P K Q K K E T R T  
 2161 AGGGAGAGTTCCCCGTCCACGGATTCCACCGGACGCAGGTATGAATTACGTGATCGCTCTAAAATAAAATCACCAGACAG 2240  
 R E S S P S T D S T G R R Y E L R D R S K I K S P D R  
 2241 ATTTACAGGTTCTGACACACCTCGTTCTTCTCGTTCCACACAGGACTCATCGTCCTCTAGAGAAGGATGGAAACCTGATC 2320  
 F Q V P D T P R S S R S T Q D S S S S R E G W K P D R  
 2321 GCAAACACAAGATCGTATTGCGAAGGCTAGCTACAACGGCTTCTGACTCCGACCGAAAAGTCAAGAAGGAGCCGCAAAAA 2400  
 K H K I V L R R L A T T A S D S D R K V K K E P Q K  
 2401 CAATTCAAGACAAAGACAACGAAAGTAGCTGCATTGTCTGCCACCATGCCTCAAGTGTTACGGGTTACAGCTGGCGGACA 2480  
 Q F K T K T T K V A A L S A H H A S S V T G S A G G H  
 M P Q V L R V Q L A D I  
 2481 TCCAATGGGCACTGGCTCTCCTAGACAGCGCCGACAGAGATCACGATCATACGCAAGACTTTGTTGCATCGTCTGAAAGCG 2560  
 P M G T G S P R Q R R R D H D H T Q D F V A S S E S D  
 Q W A L A L L D S A A E I T I I R K T L L H R L K A  
**Gag ORF end** ◀  
 2561 ACAGCAACTGATCGCTTTGTATCAGTCGAGACAGCAGACACACATGTATCACCACCCGACAGAATATATTCTGTGGCACT 2640  
 S N \*  
 T A T D R F V S V E T A D T H V S P P D R I Y S V A L  
 2641 TCAAATTGAGGGTGATCTTCGACGTCTCATAGATGCTATATTTTTGGGACAAGCTAACGTCTACTTATGACATTCTTCTAT 2720  
 Q I E G D L R R L I D A I F W D K L T S T Y D I L L S  
 2721 CTGAGGCAGACTGGCCTCCGACTTTATCAGATCCGCTCCACGCGGTGAAGAAATCATACTTCTGCTTTTTTCTTCACAT 2800  
 E A D W P P D F I R S A P R G E E I I L P A F S S H  
 2801 GTTCCTGATGAACTTAAACATTCATATGCAGCATCTTGGGCTTTGGCACAAGCACCCGCTTATATCGCAACCAGTGCGG 2880  
 V P D E L K H S Y A A S W A L A Q A P A L Y R N Q C G  
 2881 CTGGGATGAGAAATCTGATCCTCATGTCATTCCCATACGTACTGAACCACATGTGCAGCAGCAATATCCTATCAAAAAGG 2960  
 W D E K S D P H V I P I R T E P H V Q Q Q Y P I K K E  
 2961 AAGCGAAGGCTTCGGTTAAGGAAATACTCAAACAACCTTGAGTATCAGGGTGTCAATTGAACAGAGCAAATCTGAAATGAAC 3040

A K A S V K E I L K Q L E Y Q G V I E Q S K S E M N  
3041 AATCCACTTTTTCTGTAGTTAAACCTGATAATACATATCGCATAGTCTTAGATTATCGCCACCTTAACAGTTGCACGCG 3120  
N P L F P V V K P D N T Y R I V L D Y R H L N S C T R  
3121 TTCATTTGCGATACAAAACACACAGTTCAGGACTTGTGAATAATTTGACACGAAAAAATGGAAGACCACTTTGGACA 3200  
S F A I Q N T H S S G L V N N L T R K K W K T T L D I  
3201 TTTCCAATGGATTCCATGCTCAGAATCTGGCGGAAGAAAGCCAGGACTATTCTAGTTTTACCGGAATTGGCATCCAATTC 3280  
S N G F H A Q N L A E E S Q D Y S S F T G I G I Q F  
3281 AAATTTGCGGCGACTCCCAATGGGGTACAAGAACAGTCTGGAATATTCGCAGCACGAATTATAAACATACTGCAAAAAAT 3360  
**Reverse transcriptase domain**  
K F R R L P M G Y K N S P G I F A A R I I N I L Q K I  
3361 TGACCCCGATGCAGTGTCTGATGTTGATGACATCTACGTCACGGACGATGAAATCCGCATACATTTAGCCCGGGTGAATA 3440  
D P D A V S Y V D D I Y V T D D E I R I H L A R V N K  
3441 AAATAATTCTCTGCTTTGCAGCCCATGGCTATAAAATAAACTTTAAAAAATCTAAAATTGCTTTTTTTCAGTGTCTGTTT 3520  
I I L C F A A H G Y K I N F K K S K I A F F S V L F  
3521 CTGGGATACGAACTCCATGATGAGGGCAAAGCCTTGCGCCTCATTTTTCTTGAACGTTGTGCGGTGCTTCAAGTGCCAAA 3600  
L G Y E L H D E G K S L A P H F L E R C A V L Q V P N  
3601 CACGCTCACAAAGCTTCATTCTCTTTTAGGCTTTCTTAATTTTCGGACGCACTTACGTTCCAAACTACGCACAGAGAATAA 3680  
T L T K L H S L L G F L N F G R T Y V P N Y A Q R I K  
3681 AACCTCTCTATGAACTGATTGCACCAGACTACAGTTTAAAACACTGGACTGACGCACACACTGACATTTTACGTTCTTTA 3760  
P L Y E L I A P D Y S L K H W T D A H T D I L R S L  
3761 CAACAAGACCTGTTAGAACAAAAATATCTACACACACGTGACAATACCATGAACCTTGTGATCCGTGTTACACCCAGTGC 3840  
Q Q D L L E Q K Y L H T R D N T M N L V I R V T P S A  
3841 AACCGGTTTACCTATTTGACATTCAATGAGGGGGACACAGTCCCGGTGGCATATAAATCGCATTTATATTCACCAGCTG 3920  
T G F T Y L T F N E G D T V P V A Y K S H L Y S P A E  
3921 AAGTCCGTTTTGCCTCCACTGAAAAATACTGACGGCTGTGCAAATGGCGATTCTTAAAGAACGCCCTTTGGCACAAGGA 4000  
V R F A S T E K I L T A V Q M A I L K E R P L A Q G  
4001 AAARGAATTATTGTGGTGACACCTGTGCCGGCGCTGGAAGCCGTCACTAAAGCGAGTGTACCGAATTCAAAGGCACTACA 4080  
K ? I I V V T P V P A L E A V T K A S V P N S K A L H  
4081 CCCTAGATGGATACAGTGGGCAAGCTCGCTTACCTCTGTTGACGTCGACTTTGTTTTTGGACCCTACACTTCAAACACAAG 4160  
P R W I Q W A S S L T S V D V D F V F D P T L Q T Q E  
4161 AATTCTTACAATACGAGGAAATCTACCCATTGCCTCGTGAGGTTGTGCCTCTCGATCAGTATCACAAAGTTATCTATACT 4240  
F L Q Y E E I Y P L P R E V V P L D Q Y H K V I Y T  
4241 GACGGAAGTGCCCAACCGCCATAGGGAGCAAGCATAACAGCGCTGCCTGTGCCACTGTCACTGGTACCATCACTGA 4320  
**3' truncated RNaseH domain**  
D G S A Q P A I G S K Q A Y S A A C A T V T G T I T D  
4321 CGGTGTCTTTACTCCCACAAAACACGTACTATTTCTTTAGGGGATTGTACAGCACAATTGGCTGAGCTTA

G V F T P T K T R T I S L G D C T A Q L A E L ?

# AciFLERV

5' -LTR

1 **TG**TCGAATGAAGTGGGTTGAGGTTGAGATCTTGGTTATTCGATGGCCTGTGCCTGGTACTATGTGGACAATCATAATTCT 80  
81 GATTTATGTAAAATGATAAAGTTGATTAATGGAATGTAACAAATAATCTGTATGATTTCTAATCAAAGTTGAGAAGAGTG 160  
161 TGTGTAACACAGAAATGATTTGAGCACAGCATGTAAAGGAAGTTGTGAAATCTTGGAGAATCACTGAGCAGGGTAAAATG 240  
241 AGGAACGAAACCTGTTGCCTAGGAATCAGAAGGAACAGAAGGGAAAACAAGTTAAGAATAGTCTTAACTGGAAAAGTAC 320  
321 CAAACAAGCCATGTATTACAAGAAATGAAGTAATGGTCAAAGCCAAATACCATAATTGGTAATCAAACAGTGGAGTGATA 400  
401 ATTTGTCATGATGATGTTTTAAACTAGGATGTGTCTTAGACTTAAACTATAAAAAGGCGATGCACAGAAGCATCGGGTGA 480  
481 GATTCTAGGGAGCCCTTCCCAGCACCAGGACGAGTCTACAGATTGGACCAAGCCAACCCAGATGTGGACATTTAATTGAC 560  
561 TTTAAACGTCTTTGTGAGAATTCTCCCTGCATTGTCAGATGAGGATTGGAAGTACCTAAGCTGTTGGATTTCAAAGAGGA 640  
641 TTTCCGAAGAACAGTAAGGATTATAAAGAAGGACAGTCAACTGAAGGGAGTCAACATCTCTCTTTTTGGACTTCTCCTT 720  
721 TTTCCCCCAACTTCACTGAGGCAGTAACGGACTGGACTTTGGGTGTGGTCGCTTCGGCCGAGTGACTIONTCACTTCAAATTC 800  
801 AGTCTCTTCAAAAAGGATTTATGGACAGAATTGGACATTTTCAAGCCCCTTCTTCATCAACCCAGCTCATAAGTAACCAT 880  
881 TTTGATTGAGATTAAGTTTTTGGATTTATTCTGTTTTTGAAGTTTAGATTTTGGAGCTGATTGTTGACATTCAGAATTGAT 960  
961 TGAGAATTGATTTTGGAGCTAGATGCAAACCTGCTTGGAGCTGAAAACCTGCATAATAAAAATTTGACTCTAAAAAGTCAGTAT 1040  
1041 AATTCGTTGAGAATTAATCCCTTTTTAACGGTACACTTATGTCCATGCAACAGTAAAACCTCTAGGCAAGTTAAGCTATA 1120  
1121 ACATCTGGTTCATTTTTGGACACACTAGTCGTAAGTAATCCACTTCAACTTAACTTATGTCCCTTGGGCTCACTGTCCGA 1200  
1201 GCCGATAAAAGAAATCTGGTCGGTAACAAGCGCACTGATCAAAGGGGCTGGCTGCTATAACTATCTGGGCTGTATTTTGG 1280  
1281 GGTCCGGCTGCGTGAGCCTTCCTGACCGGCAGCATCAGAGTACAGAGGAAGCGGGGCAGATGTTAGGATTATTAGCAGTTA 1360  
1361 GAGCCAGACGAGCAGCCCCGCCACAGCTTAAGTAGTGTCACTGAGCTCAGAAGTGGGTAATACCCTGCTGGCCAAGTGAT 1440  
1441 CAGGACCCATGAAACGGAGTAGCTGTCCAGAGGTAATAACCTGTGGGATCTAA**CA**<sup>PBS</sup>**CGTGGCGCCCAACGTGGGGC**GT 1520  
1521 GGCCGAAAAAAGAGGATTTGCGCCGCGCCTAAAGAACCTAGATAGCCCGGAGAGGTTATCATTCGTGGGAGATAACCCCAG 1600  
1601 GATTGATTGAAGGAGCAGCGCAGGCAGAGAGGACTTCGTGAGCTGTTTCAAGGAGCGTAAGCGGGGATCAACCGACGCTCT 1680  
1681 CAACCTGTCCAGGAAGCGGAGTGACGCGGACAGGAGTAGCAGCAGACGTCGCTGAGGACACCCAGACCGACAGGGGCCA 1760  
1761 GAGGACTCTGCAGGAAGGCAACGCTCGACTCCATCCCTTGCCCTCGGAAGTACAACGAGGGGCCTTGGAGGAGAGCAACTC 1840  
1841 GAGACGACAAAGACAAAGAGCGCCGACCAGTCTAGAGATGGCTGAGGCGACTGATGAAGGAGTGCCAGAGGAGCCCCAA 1920  
M A E A T D E G V P E E P Q  
1921 CCAGAAGGGGTGTCCCTCTTTAAGTCACTCAAGGCACCCGGCGAGGAGGAACCGGAGGCGCCTGCCCCATCGGAGGCAGG 2000  
P E G V S L F K S L K A P G E E E P E A P A P S E A G  
2001 GTCGACGGAGGCGCAGGGAGCAACAGGGCCGGCAGTATCCAGGTCCAGGCATGGGCGATGATTCATGTTGTCCCATGGG 2080  
S T E A Q G A T G P A V S Q V Q A W A M I H V V P W G  
2081 GACAAGGATGGAAGAAATGGGAAGCTGCAATCCAGCATCACGTAGCTTCAAGGTGTATCGACATGGATGAAGGAGAAGTT 2160  
Q G W K K W E A A I Q H H V A S R C I D M D E G E V  
2161 GGTAAGGCGGTGGATGCAGCTTGCAGCAAAAACCAAGCTTATCGACACCCGAAGTGTGAACCGAATTTGGGTTCAAGT 2240  
G K A V D A A C S K N Q A Y R T P E V L N R I W V Q V

2241 GGAACCGTCCCCTGAGCCCGGGACGAAGAAGGATATAATACAGAAGTGGCTGGAATGGGCAGTAAAGGTAATATGGCCCC 2320  
E P S P E P G T K K D I I Q K W L E W A V K V I W P D

2321 ACGGGGTAGAGGAAGAACCGCGACCCATAGCATCGTGGATTAGTCCCCAACCCAGAGTATGATCCTATTATTAAGATGTTG 2400  
G V E E E P R P I A S W I S P Q P E Y D P I I K M L

2401 GGAAAGGTGACAGGTACTGGTGCAGTTGAAGTAGAAACAAAAGTTACTGCAGCTAAGCAGTACAAAGAACACCGAGAGTT 2480  
G K V T G T G A V E V E T K V T A A K Q Y K E H R E L

2481 ATTGTTACAGTTGGAAAAGTATCAGGGGAGGGCTGAGGAACTCTTCAAGGACCCCCCTGAAAAGTATAGTGGGATCCCAGA 2560  
L L Q L E K Y Q G R A E E L F K D P P E S I V G S Q M

2561 TGGAGGATGGAGAAACCGGCTCGGAGGATGACTCTGAATTGGATTCTGAGAGAGATGGAAAATGGGATCTAAAGGGAACA 2640  
E D G E T G S E D D S E L D S E R D G K W D L K G T

2641 AACTGCACCTAGCGGACCTGCCCTACAAGCTTGAGAGTGCATCAGAGACACCACGGAAGGTGCAACCCCTCCTGCGGGA 2720  
T L H L A D L P Y K L E S A S E T P R K V Q P L L R E

2721 GCAGGAGGACCGGCTGAGGGAGAAGTATAAATGGACTTCCCCATTTGGCCTGGTGGACGAACCAGTTCGAGAGGAGACTC 2800  
Q E D R L R E K Y K W T S P F G L V D E P V R E E T P

2801 CGTCGGACTGGCTCCCTAAACTTGATCCTGTCCCAGCGGAGGCCCTGAAGTGGAGGGGCCAGACTCAGAGGACAATGTAT 2880  
S D W L P K L D P V P A E A L K W R G Q T Q R T M Y

2881 CATCACTATGGTGGCCATGGGAGTTAGATGGACATGGACTGATTGTTCTGACAAACTCCCAATATAATCCTAGAAATAA 2960  
H H Y G E P W E L D G H G L I V L T N S Q Y N P R N N

2961 TAATTTCAAAAAGGAGTTAAAGAATCAAGCAGGCAGGGAATATATCGAAGAGTTAAAAGACAGAGTAAAAAAGTTAAAGG 3040  
N F K K E L K N Q A G R E Y I E E L K D R V K K L K G

3041 GATCGGAGAAAGGAACGCGGGTCTGATCACCAGTGGTGGAGAGTCTGGGCACTTTGCTATCATACATGTTCCAGTGCCG 3120  
S E K G T R V L I T S G G E S G H F A I I H V P V P

3121 GGATATCCGAAAGGACAACCTTCAGAGGAGTATGAGCAACAGTTGGTTGATGCTCTAGAAGAAGGACTGCGTAGTGCCAG 3200  
G Y P K G Q P S E E Y E Q Q L V D A L E E G L R S A S

3201 CAATGCAGGATATGCACGAGTGACAATGTGTGTTGATGGGATCAGATCAGGCGATTTGCCATGGATTGTGGCTGAACAGG 3280  
N A G Y A R V T M C V D G I R S G D L P W I V A E Q A

3281 CCATGGTACGAGCTGGGCGTCTACACACCACTGGGGCAGCGGCCTGGTCTGGGATCACAGAATTGGTCCTGGTCACCTCC 3360  
M V R A G R L H T T G A A A W S G I T E L V L V T S

3361 AAGAAGCAGCATAAAGAGTTCCGGGAGCGTCTTTCCGTGAAGCTGAGGCGGCAAGGAGGTGAGAATTCCTGGGTTCCGGT 3440  
K K Q H K E F R E R L S V K L R R Q G G E N S W V P V

3441 GGCCAGAGAGACGCCGGGAGCCCCGCTGAGGACATCGCGGCTTAAAAGTACTTCAACCCCGGGCAAAGATGACGGGGAAG 3520  
A R E T P G A P L R T S R L K S T S T P G K D D G E E

3521 AACCATCGACATCTCAACAACAGCCCCCCTCAGTTAAGACACCAGCGCGGATGAAGCCTGAGGCAGTAACCCCAAGGGTG 3600

P S T S Q Q Q P P S V K T P A R M K P E A V T P R V  
3601 AAGGCCTCCCCTGCACGACTTAGCCTGCAACCAATGAACGATTACGTTGGTATGCGGACTGAGGGAAATACAGGGGTTGC 3680  
K A S P A R L S L Q P M N D Y V G M R T E G N T G V A  
3681 TACCTTCACCTACAGGGTGCCATCCCCACCAACGTGCCAGAGGTGGTCAACACATCGATTTCGTGGGCCAGCAGTCACAC 3760  
T F T Y R V P S P T N V P E V V N T S I R G P A V T P  
3761 CACGGCAGGAGGCACAGAGGGAGCCGATGATCTCGTCCAGCTATGCAGGACGACAGCCGGAATACAGTGACATCAGTGAA 3840  
R Q E A Q R E P M I S S S Y A G R Q P E Y S D I S E  
3841 GACAGTAGCAGTGATGGTGAAGGAGAGAAAGAAAGTGAAGGAGAGGTGGATGCCATGACTTCTGCACGACAGGAGGATAT 3920  
D S S S D G E G E K E S E E E V D A M T S A R Q E D I  
3921 CACCGGAGCGGTTGAGCTGAGGGTAGGACAGAGGAAAGGGACAAAGAAGAAGACCCAGTGTACTCTGTCTATCGCACCT 4000  
T G A V E L R V G Q R K G T K K K T P V Y S V Y R T S  
4001 CAGAGAAGATGGCCCGGATCTCTCCTTCGGGTGTGTGGAACCAGAGATGGACGGAAGGCGTATATGCCCGAGGCCGGC 4080  
E K M A R D L S F G C V E T R D G R K A Y M P E A G  
4081 CAGCAGGATTATGGAATACCAATAGAATGGGCAGAACGACTCGAAGAAGAGGTTCGTGTTGCCAGTGAAAGCACCAGTAAG 4160  
Q Q D Y G I P I E W A E R L E E E V V L P V K A P V R  
4161 GGAATGGGCTAACTTCCTAATGGCTCCTACCTACCCACACTGAGAAGCCATGAGCCGCTAACAACTAATTTCAAGAATG 4240  
E W A N F L M A P T Y P T L R S H E P L T T N F K N A  
4241 CCTTTCTAGCCATCACACACGATGTCATGCTCCGTCGCTTGAAGAAATCTGCCCTCAAATATGCAAGGGAGACAGAAATT 4320  
F L A I T H D V M L R R L K K S A L K Y A R E T E I  
4321 CAACGCCAGCGAGAGCTATCCTCTAGTGATGAGGAAGAGCCAAGGATACCCCTCCAACCAAGAGCTGAGCTGCAGGCACG 4400  
Q R Q R E L S S S D E E E P R I P L Q P R A E L Q A R  
4401 CCGGACCACCAGAGATGTAGCGGTGGATGCTAACGGAGTTGGCGGCCAGTAGTGACGGGAGGAGGTTTCGAGCTTTGAGG 4480  
R T T R D V A V D A N G V G A P V V T G G G S S F E E  
4481 AATTCAAAAAGATAAAGGCGCTGGTGCAGGAGAGATCTCCGACTCAGAGTCTACAGGAGTACCTGAAGCAACACTGGCAG 4560  
F K K I K A L V Q E R S P T Q S L Q E Y L K Q H W Q  
4561 ATGGTAATGACCTGCACCCAAGATAACCAAGCAGACTAATGTGGCTAGCCCGTGCCACTGGGCAAGCATTAGGCCCAGA 4640  
M V M T C T Q D N Q A R L M W L A R A T G Q A L G P E  
4641 GGAATCAGCTGAAGAACATTACAAAAGACTGGTCTTGGAGGACTTCGACGACGAAGACACCAAGATAGAAAAGGCACGGG 4720  
E S A E E H Y K R L V L E D F D D E D T K I E K A R G  
4721 GACAAC TAGACCAAGGACAGACCCTGTCACAAGTGTGGCATGTTTTGAGTAATGAAATCCCCGTAGGTTCGGAATGTGCAG 4800  
Q L D Q G Q T L S Q V W H V L S N E I P V G R N V Q  
4801 GCGCTCAGGAGGCTGATGAAGGGCCGTAAGGGTGAATGGATTTTCGTCACCCTGCATCCTGCAAACAGCACACAGGAACA 4880  
A L R R L M K G R K G E M D F V T L H P A N S T Q E Q  
4881 GATAAGGGAGGTGGTGA AAAAGTGGGACCTCAAGAGGAAGTTT GAGGAACAAAGGCGGGCCGAAGAGGGTCAACGTACTC 4960

I R E V V K K W D L K R K F E E Q R R A E E G Q R T Q  
 4961 AACAGAAGGCTGCCACCCCGAAACCCACCAAACCCACAGGGTCAGCAAAGGAAGACAGATCAACGACCTGCCTTCCAA 5040  
 Q K A A T P K P P P N P Q G Q Q R K T D Q R P A F Q  
 5041 GGTCCACCCAAGAATGCCACGAGCAGCCGGCCATCTGACCAGAGACCACCAAAGGGGGATTCTACAAATAAGAGGCCTGG 5120  
 G P P K N A T S S R P S D Q R P P K G D S T N K R P G  
 5121 ATATCTGCCTTTTCGAGGAGTTTAGGAAATTAACGCCAGAACAGAAGGACGCCCTCCGACTCGCCCGCCAGCAGACGGCTG 5200  
 Y L P F E E F R K L T P E Q K D A L R L A R Q Q T A A  
**Gag ORF end** ← → **Pol ORF**  
 5201 CGGGAGGGAAGAAGGAGTAAATGGACACGACAGCTCAAGTCACCCTGGAGCATGCTTACCGGGTCAAGGATAAGATCTACA 5280  
 G G K K E \*  
 M D T T A Q V T L E H A Y R V K D K I Y T  
 5281 CCCAGGTCGATGGAGCTCCGTATTTGGTGGACTCAGGGGCTGAGGTGTCAATGACACGGAGGGCTCTGAGTCCTAAAGGG 5360  
 Q V D G A P Y L V D S G A E V S M T R R A L S P K G  
 5361 AAGTTGACGGTGCAGTTGGCGGATGCCTCCATCGCTGAAGTCCCCTATGGCATCTGGAGGGGGATTATATGGATCCTGGG 5440  
 K L T V Q L A D A S I A E V P Y G I W R G I I W I L G  
 5441 GACCTATGACTTGGTAACCATCACGGATTTAGAAGGATTACATCAGAGACCACGAAACCGCAGGAAGGTGGAGGAACGTC 5520  
 T Y D L V T I T D L E G L H Q R P R N R R K V E E R L  
 5521 TGAAGATTTTGCAGGCGCGCCTAGTCAAGATACCTACGGTCGAGGACCAGGTCCGAGGGGGCTGGTACAAACCGGTTAAT 5600  
 K I L Q A R L V K I P T V E D Q V G G A W Y K P V N  
 5601 GTTCCAGAGGTGACAGAGCAGAAATTACAGGAGAGTGATCTCTCTCCAGAAGGGAAACAGCGGTTGAGGGAGATCATCTC 5680  
 V P E V T E Q K L Q E S D L S P E G K Q R L R E I I S  
 5681 CAAAGCAAAGTAGCGAGATTTAAAAATGACTGTGGCGATCTAGGAACCAAATACATCCATACCATAGAAGGGGGAGTAC 5760  
**Aspartic protease**  
 K A K V A R F K N D C G D L G T K Y I H T I E G G V H  
 5761 ATCCACCAGTTCGACAGTACCCCTGAATCCGGGAGCAGTGAAAGAAATGGACCTCATAGTCAGAGAATTACTGACTCTG 5840  
 P P V R Q Y P L N P G A V K E M D L I V R E L L T L  
 5841 GGAGTAATTCGTGAGGAATTAATCCAATCACTAACAGCCCGATACAGGCAGTAAAAAAGCCAGAATCCTCAGGAGGAGG 5920  
 G V I R Q E L N P I T N S P I Q A V K K P E S S G G G  
 5921 CTGGCGACCTGTGATTAACTTCAAGGCTCTGAATAGAAGAACTGTAGCTAACAGAGCAAGCCTAATCAACCCGCAAGGGA 6000  
 W R P V I N F K A L N R R T V A N R A S L I N P Q G T  
 6001 CTTTAAAGACCCTAAAGCTAAAGCCCTTTAAATCCTGTATAGACTTGGCAAATGGATTTTTCTCCCTACGACTGACACGA 6080  
 L K T L K L K P F K S C I D L A N G F F S L R L T R  
 6081 GGATCCCAGGGGAAGACGGCCTTACCCACAAGGGAAGATCCTACGTTTGGGAGAGGCTTCCACAAGGCTACAAAAATTC 6160  
**Reverse transcriptase domain**  
 G S Q G K T A F T H K G R S Y V W E R L P Q G Y K N S  
 6161 TCCAACGTGTTCCAAGCAGCAGTTATGGATGTACTTGATGGATTAGGTGCCACTATTTATATAGATGATGTGTTTCATTG 6240



P N V F Q A A V M D V L D G L G A T I Y I D D V F I A  
6241 CAGATGACACGGAGGAGCAGCACTTGGACAGATTGCAGAAGATCGTGAACGACTAACCGCTGCAGGACTCAAGCTGAAC 6320  
D D T E E Q H L D R L Q K I V E R L T A A G L K L N  
6321 TTGAAGAAGTGTCTAGTTTGGGCGAAAGCGAGTGGACTATCTAGGATTCCAGGTGTCTGACGATTTGGGACTATCTGAAGT 6400  
L K K C Q F G R K R V D Y L G F Q V S D D L G L S E V  
6401 GTACAGAAAAAGATCGAGCAGATAGAACCTCCGTCGTCCTGAATGAACTGCAAAAAGTGTAGGACTATGCAACTATG 6480  
Y R K K I E Q I E P P S S L N E L Q K V L G L C N Y V  
6481 TGAGAGACTATGTTCCAGGATATCAGAGGTATGCTAAACCCCTGTATGCCAAACTAAAGAAACCAGATGAGACTGCAGCA 6560  
R D Y V P G Y Q R Y A K P L Y A K L K K P D E T A A  
6561 TGGAATTGGACAGCGGCTGATCAAAGCAACTTGAAGAGCTGAGACAAGCGATCCAAGGGGCTCTGAGGCTTGAACCCCG 6640  
W N W T A A D Q S N L E E L R Q A I Q G A L R L E P R  
6641 AAGTCCAACGGCAAAGTTGGTTGCAGAAATAAGCTGCGATGAGGATAGTGCTACAGTAAAGGTGAGCAATGAGGGCGGTG 6720  
S P T A K L V A E I S C D E D S A T V K V S N E G G G  
6721 GACTAGTCACCTTATGGAGTTATGCTCTGACTTCGGTGAAGTGAAGTTTCCCCCTGAAGAGAAGGAGCTTGCGGTGCTT 6800  
L V T L W S Y A L T S V E V K F P P E E K E L A V L  
6801 GCACGGTACTGGAGCTCCTTGAAGGATTTGGCGCAAGGCCAGGAATCCGAGTCATCACCGAAAGCCAAGTACACCGTTT 6880  
A R Y W S S L K D L A Q G Q G I R V I T E S Q V H R F  
6881 CCTCAGAAAAGCCACTATTGAAAGCACTAAAGCAACTAACGCCAGATGGGGCCGGTGGGAAGACATCCTACTGGATCCAG 6960  
L R K A T I E S T K A T N A R W G R W E D I L L D P D  
6961 ATCTCGAGATTGGACCACTACAACCGGGAGTTCCAAAAGCTGCAACAGCTGAGAAACCGACGCAAGAGGAGTACGATTGG 7040  
L E I G P L Q P G V P K A A T A E K P T Q E E Y D W  
7041 ACTCTTTTCACAGACGGCTCGAGAAAAGGACCTGACGACACCGCGTACTGGGGATTTATTCTCAAGCTGAAAGGAAAGGA 7120  
T L F T D G S R K G P D D T A Y W G F I L K L K G K E  
7121 ACAGACCCGCCAGCGAGGGAAAGCACCCGGCAGCGCGCAGGCTGGGGAAGTGACAGCAGTGTGGAGGGCCTGTTAGAGC 7200  
Q T R Q R G K A P G S A Q A G E V T A V L E G L L E L  
7201 TGGAAAAGAGGAAGATTAACGAGCAAAAATAATAACAGACAGTTATTATTGCGCTCAAGCGTTAAAAGAAGATCTGACC 7280  
**RNaseH domain**  
E K R K I K R A K I I T D S Y Y C A Q A L K E D L T  
7281 ATTTGGGAAGAAAATGGATATGAAACAGCGAAAGGAAAGAAAGTAGCCCATGAAGATTTGTGGAAAAAGATTGCCGAGCT 7360  
I W E E N G Y E T A K G K K V A H E D L W K K I A E L  
7361 ACGAATGAACCTGGATTTGGAGGTTGTACATCAGAAGGCCCATGTTAAAGAAGGAGCTCACTGGCGAGGAAACGAAGAAG 7440  
R M N L D L E V V H Q K A H V K E G A H W R G N E E V  
7441 TGGATCGTTTCGTCCAGATGAGAAAAATTGTCTTTGTCTGGGATCGAGAAATGGGACAACACGCCTCAGGGTAAGCTTGTC 7520  
D R F V Q M R K I V F V G I E K W D N T P Q G K L V  
7521 CCGAAAGACTGCGTGAAGGGGGTAACGGAAGCAGTGCATGAGGCACTAGGCCATGCCGAGCTGACCCGACGCGCAGGGA 7600

P K D C V K G V T E A V H E A L G H A G A D P T R R E  
 7601 GCTGAAGAAACAGCAGCTATGGATTCCAGTACGAGAAATCCGGCGTGTCTCAAAGACTGTGTTGAGTGTGGTCGGTACA 7680  
 L K K Q Q L W I P V R E I R R V L K D C V E C G R Y N  
 7681 ACGCAGGTCGGCGGGGGCAGCGCATGGGAGGACTCACCATCAAGAGCACTGTTCCCTGGGGGTTCGATTTGTATGGATGTA 7760  
 A G R R G Q R M G G L T I K S T V P W G S I C M D V  
 7761 GCAGGACCCTTAGGGATAACAGGTATGAAAGGAGAAAAATATCTGTTAGTGTGGTGGACTCTATGTCAGGGTATGTTGC 7840  
 A G P L G I T G M K G E K Y L L V L V D S M S G Y V A  
 7841 TGTGAAACCTGTGCGCCAAGCAAATGGTTCCAGTGTAGTCAGCATGCTGGATCAGGCATGCTGCTATATGGGAATACCCA 7920  
**Integrase core domain**  
 V K P V R Q A N G S S V V S M L D Q A C C Y M G I P K  
 7921 AGGAGCTAAGAACGGACAATGGAACGCACTTTCGGAACGCTAAGGTGGACCAGTGGTGTCAAGAGAATGGGGTGATGAGA 8000  
 E L R T D N G T H F R N A K V D Q W C Q E N G V M R  
 8001 GTGTATTCACCACCATATACACCGCAGGCCAACGGAGTGGTCGAGCGAACCATTGGACTGGTAAAGAGCTGGATTGGTAA 8080  
 V Y S P P Y T P Q A N G V V E R T I G L V K S W I G K  
 8081 AAATGCTAATGGTAAAGAATGGAGTACAAAAGTCCTAGAGCTAGTCAAGACCCTGAATGACAGGCATCGACAAGGGAGGC 8160  
 N A N G K E W S T K V L E L V K T L N D R H R Q G R P  
 8161 CCTCGCCAGCAGAGGAATTGAATCAACGCCCTTACGTCACAAGAGGCGGGCAGGAGCTCAGATGACAAGAGGCCGTCC 8240  
 S P A E E L N Q R P F T S Q E A G R S S D D K R P S  
 8241 CCCGATGACAAAATGTCACTGCAGGTTGGACAGCGAGTATGGATTAAGCACAGGCTCACCCAGCTGGAGCAGCTGTGAA 8320  
 P D D K M S L Q V G Q R V W I K A Q A H P A G A A V K  
 8321 AGCAAAGTACGACAAGACTGACATAGTACTGAGATCTTGGACCGAAACACGGTTTCGGTTGAAGAAGTCAGGAATCCAAG 8400  
 A K Y D K T D I V T E I L D R N T V R L K K S G I Q G  
 8401 GAGTAGAGCAGCTGAAACCAGTTCCTGATTAGGTTGACCTAGGAACCAAAAACCATGGCCAGTAGCACACCTTGCCTACCA 8480  
 V E Q L K P V P D \* **Pol ORF end** **Acc3 ORF**  
 M A S S T P C L P  
 8481 CCCTATGTCAGACTGGCCACTGTTAAGGGGGTGGTTATCATGAGACGCAGTACCGATGGGCTCTGGGCAGGCAGAGCCCT 8560  
 P Y V R L A T V K G V V I M R R S T D G L W A G R A L  
 8561 TGAAATGTTGGAGTTTGCCAAAGAAGGAATCTTTACAAGTGACAAAGAGTTCCTGCAATGGAAAGAAATTAGAAATAACT 8640  
 E M L E F A K E G I F T S D K E F L Q W K E I R N N C  
 8641 GTGTGGTGTGTTGGAAACCCACCACCCTGGGTGTCCAGTGGGAAGGCCAGGAAGGAATAAGCCCCTCCGGGCTGAAGCA 8720  
 V V C W K P T T L G V Q W E G P G R N K P L R A E A  
 8721 AATCGGAGGAATTCAGGGGGATGCACCCCAAACAGTAAAAGTGTGGATGGTCATGTGTGTGGACTATGCCGGCTGAA 8800  
 N R R E F R G M H P K P V K V L D G H V C G L C R L N  
 8801 TGGTTTACCCCGACTGAAGTTTTACTACTCAGTGGGATTTAAGAGGAGGAAAAGTGGACTGCAGAGAGTGTACCTGCCAGT 8880

G L P R L K F Y T Q W D L R G G K V D C R E C T C Q W  
 8881 GGGATGGTGAACGACTCCACCCATGTGGCAACTGCAAGCTGCAGCAAGAGAGTGGACGTCTGCTGCAGGTGCCACCGCA 8960  
 D G E R L H P C G N C K L Q Q E S G R L L Q V A T A  
 8961 GAGGGATGGCAGGTGAGGAAATTCCTGGACCCTCTGCAGCGCTTCACAACAGCGACGGTGAAGGAGGAGAACGAGGGGA 9040  
 E G W Q V R K F L D P L Q R F T T A T V E G G E R G E  
 9041 GAGCGGGAGTGACCCACTCAGTTCCTGATCCCGGCTCGCCAGAGACCGAGGGCCCTTCTGCACCACCCTGCCACCGG 9120  
 S G S D P L S S P D P G S P E T E G P S A P P L P P E  
 9121 AACCTCATCAGCGAGAGGGCGAGGAAAGGAGCAGCGAGACATCCTGAGCAGGAGCAGCTGTGGAAGGAGGCGATTAAG 9200  
 P S S A R G R G K G A A R H P E Q E Q L W K E A I K  
 9201 AGAGGATGGCCTTACAGTCCGGCTCGGACGGAGATCCACGAGCCACCGCCATCAATGGAGCAGGTGAATATGGTGTTCG 9280  
 R G W P Y S P A R T E I H E P P P S M E Q V N M V F R  
 9281 AGTGCAAAGGGACCCCGATGACCCAGGATACTCCCTATCTCGAGAGATCTGAGAGAAGATCAGCGGGAGATGGCGGAGA 9360  
 V Q R D P D D P G Y S P I S R D L R E D Q R E M A E S  
 9361 GCCAGGGCTGGACTGGACCATGGGAGCTGACCACTTGGGGCCGTCTAATAGAGGAGGTTTACTCTGATCCTTCCCTACCG 9440  
 Q G W T G P W E L T T W G R L I E E V Y S D P S L P  
 9441 GTCCAAGATTTGGAACCAGTCCAAGAGAGGCCGGGGCGAGAAGCACCAACCTGTTCTACAGTACCACAAGCCTGGATGC 9520  
 V Q D L E P V P R E A G A R S T N L F Y S T T S L D A  
 9521 ATGGGGCCACCAGGCGGCGGAGCCAAAGAAAAGAGTAAGGAGTATGTGGTGACCCAGAGGCGTGGCGAAGAGAAGGGG 9600  
 W G H Q A A R A K E K S K E Y V V T P E A W R R E G V  
 9601 TGGTCCAACCTGCCTGGGACGTGGGCAGGGCGTGCGGCCACGCCACCTACCCTGAGCAGCTGACCAGGGTACGAGTGGCG 9680  
 V Q L P G T W A G R A A T P T Y P E Q L T R V R V A  
 9681 GTTCAGACTGTGATCATTCCCTTCCGAGGAGTCTACTCAGTCGGAGCCACAGTGACGTGCCTGGGAGAACCACCAAAGCC 9760  
 V Q T V I I P F R G V Y S V G A T V T C L G E P P K P  
 9761 TGAAGAGGCAGAAAAGAGGGGAAAGGGAAGTGAACCCTTTCCAACGATTCAAGGTGAAGAAAATGGAGCCGCAAGTCCC 9840  
 E E A E K E G K G K W N P F Q R F K V K K W S R K S Q  
 M E P Q V P  
 9841 AGCAGTAGCCGATACTGGGACACAGGGACGGGCACGGAGGCGGAAAGAAAGGTGGCAGAGGAAGCTGGCCCGTGTACCCT 9920  
 Q \*  
 A V A D T G T Q G R A R R R K E R W Q R K L A R V P Y  
 9921 ATATAAGGCTGCCAAATCAGAAGGTATGGTTAAAATACCCGAAGAGTGACTATTCATATAATTGGATGTATTGTGGATCT 10000  
 I R L P N Q K V W L K Y P K S D Y S Y N W M Y C G S  
 10001 GCAGCGTATTGCTGTAGTACCGGGGAAGTAACCAGATCAGCCGACTTATCAAAGCCTGAAGAAGGGCAAATGGGAGGTAA 10080  
 A A Y C C S T G E V T R S A D L S K P E E G Q M G G K  
 10081 AGTGTTCGTGGACATGAGTTGCAGTTCTTCTCGTTGAACTATGAACTTTTCAAGGGCCGATGGAAGAACCAGCCCGTGG 10160

← **Acc3 ORF end**

→ **Acc4 ORF**

V F R G H E L Q F F S L N Y E L F K G R W K N Q P V V

10161 TGGGGTGCCCCGAGTCGATGCCCTGGGTCCTTAATACAGTGTACCTTCAAGTCAACCACGAGCTGTTCAAGCTCCGCTGG 10240

G C P E S M P W V L N T V Y L Q V N H E L F K L R W

10241 GGGGTTAATCACTGCCAACCTTGGTTAGGGACGTATGTGAAATATGGCTCGGAAGCCTGCTTATATGGACTAACAGCCC 10320

G V N H C Q P W L G T Y V E I W L G S L L I W T N S P

10321 TCACACTCACCAGAAGTTGCAGCAGAGAATTAAGATCCAGAGCGGGTTGTAATGGAAAATCAGCACCTGCCTCTGAAAG 10400

H T H Q K L Q Q R I K D P E R V V M E N Q H L P L K V

10401 TGCAGGAGAAGAACTTTCCCAATTCTCGCCAGTCTATGATAAGTCTACCCAAGACACGGAGGGATGAGCCTCACCTCTT 10480

Q E K N F P N S R Q S M I S L P K T R R D E P H P L

10481 CTGCCAAGCCCTGACAGATGGGGAAAATTGGTGAATTGCTGGACCGCCGAGGTGAGCCCTTAGTTGCTGAGCTGGCAAT 10560

L P S P D R W G K L V E L L D R R G E P L V A E L A M

10561 GGTACGGGCTGAGGAACCTCGTCGGCCGACGGGAAGAGTTATCATTACCCGCTACACTTGGATGTGGAAGGGCTTCGACC 10640

V R A E E P R R P T G R V I I T R Y T W M W K G F D P

10641 CATGTATCAGGGACCATTACAAGATTCACAATTGTGACAAAGATAAGCATCCTTATCCGTTGATGAGACCACTCATGATA 10720

C I R D H Y K I H N C D K D K H P Y P L M R P L M I

10721 GCACGGCTGTGGCGGGATCCATCAGGACATCTGCACTCACCACGACCCAAGGTAACAGTGGTTTCTCTGTCACTGGAGA 10800

A R L W R D P S G H L H S P R P K V T V V P L S P G D

10801 CAGGGGGAGGAGCTACTGGCTGTGATTAACTGAGCCCCGTAAGGCCTAAATCCATTCACCACCTGAGGCCTTGAGAAG 10880

R G R S Y W L \*

10881 TGAGCAGCATGGCTGGAAGAACTCTATTCTGTCCTGCAAAATGGATTATTTTTGAAAATATTGTCGGCTTTCTGGGACTT 10960

M A G R T L F C P A K W I I L K T I V G F L G L

10961 TCTGCTATTTTGATATTTTGTATTTTCATGAAATGGACTCTGGGAGAGTGATCATGTAAGGATCAGCTACACTTCCAC 11040

S A I L I F L Y F H G N G L W E S D H V R I S Y T S T

11041 TGAAAGGTATAACCAAACCTGTTGGAATGTCAAAAAGGAAATAGTCACAATAAGGAATTTTTCCCTGTTTTGTGATGAAG 11120

E R Y N Q T C W N V K K E I V T I R N F S L F C D E D

11121 ATGAAGAGGACAACCTGCACGGAAGCAGTGTCTGCTTTTAAATGTTTCAGTGTACTGCAATTCTTTGACTCCCATAGAGGC 11200

E E D N C T E A V S A F N V S V L L Q F F D S H R G

11201 GAAGGAGGGGGAGTAATCGAGGCGATTGACTTTCAAGGTGAGACACTGCTTTTGCATGGCATTATCCCCAACAAAATGA 11280

E G G G V I E A I D F Q G E T L L L H G I I P Q Q N E

11281 GACCCGTATGGTGAAGCTAATTGGATTCAAGTGGACGGACAGAACCCGTATTGGTACTACACGCAGGCATGTGTCAAAG 11360

T R M V Q A N W I Q V D G Q N P Y W Y Y T Q A C V K G

11361 GAAGGAAGATAACCTACTGGGCTGAAGAGGTAACCTCTGCCAGCTCACAATTTTCAGCAACAATGTCATGCAACGATCCCG 11440

R K I T Y W A E E V T L P A H N F Q Q Q C H A T I P

Acc4 ORF end ◀

▶ Env ORF

11441 AAGCCGGAGGTGTTTTGGGGAAATCTGAATCTGACATGTGATATGCAGACTCAACTTGAAGGGCATGAAGATAATGGCAC 11520  
K P E V F W G N L N L T C D M Q T Q L E G H E D N G T

11521 CGGGAAGTTCCCCGTAGCCACGGGAATAACTCTACAACAGCCAGCAACTCCACACCGAAGCCTGGAACGAGGAAAAGGC 11600  
G K F P V A H G N N S T T A S N S T P K P G T R K R P

11601 CACAACCGGTCCAGAAAAGGCCTCCCCAGGTTTCAGAAGCTGACCAGAAAAGAATGAGGAAATGCATGGAGGAGAAGGTC 11680  
Q P V Q K R P P Q V S E A D Q K R M R K C M E E K V

11681 TTCAAGCTTAATCCTTGTTACTGGAGTTTGGGGCCTATAGTGTGCAAAAGACAGCACTATCTGGTTCTGAGCCAGGCCGA 11760  
F K L N P C Y W S L G P I V C K R Q H Y L V L S Q A E

11761 GGAAAAGACTTGGAGAGTCTGGAGCAATGACTGGTTCGGGAGAGGGACAAGAAGGAAGGGAGATCCACCCGATTCTGGGG 11840  
E K T W R V W S N D W F G R G T R R K G D P P D S G G

11841 GGATCTGGATTGACGACTGGCTGAATCAGAGTCTACCGTGGGTGTGGAAGAGAGGAGTAACCCATCTGAGGGCAACTGCT 11920  
I W I D D W L N Q S L P W V W K R G V T H L R A T A

11921 GACTGTGACGCAGCCCAACCAACTGGGAGGCCAGAGAGGTGGAAATGTATGTCCAAAGAATCCCAACACCTGATGA 12000  
D T V T Q P N Q L G G P E R S E M Y V Q R I P T P D E

12001 GTTATGGTCTGCACCATCAGGAGACTTTGATAAAATTGACCGATGTGTCTCCAGAAAATGGCGGCAGATCTTGACGGGA 12080  
L W S A P S G D F D K I D R C V L Q K M A A D L D G K

12081 AAGACTACTCGAAAGGTGAAGGAACAGTGTACAGTATTGGGCGTGCCCAAGGTGTGACATTACCCAAGTGGGAGCATGG 12160  
D Y S K G E G T V S Q Y W A S P R C D I T Q V G A W

12161 AGTGAGGGATATTGGAAGTACAATTGTTCCCGAATGAAAAGCCATAACACCATGAAGGGGGTGTCTGGAGCAGTGGCCGCT 12240  
S E G Y W K Y N C S R M K S H N T M K G V L E Q W P L

12241 GTTTTGGGATGCCCTGATAAGACTCGAACATGGTGGGGTCTGCAGAAAGAGGAAACCGAAGCCTGGGTTTTGCCGTGCC 12320  
F W D A P D K T R T W W G L Q K E E T E A W V L P C L

12321 TGTCAAAACGAAGAATTATTGGATTAAGTATCAATACGTGGCTACAGTCTATTCCACAGGGGAAGGACTCTATGAATGG 12400  
S Q T K N Y W I K Y Q Y V A T V Y S T G E G L Y E W

12401 TATAGATGGACTGGCATCAGACCAAGTGTGACCTTAACCCGAGACCGTGGAAAATGAGATGTAATCGAGCCAACGACAC 12480  
Y R W T G I R P S V T L T P R P W K M R C N R A N D T

12481 CTGCACCATAGAGCTGGCAGTAGACCCTGCAGTGAGTTAGATGGCTGGAGTAATGACTGTACTGAGTGGTATGGCGGAG 12560  
C T I E L A R R P C S E L D G W S N D C T E W Y G G A

12561 CTTACGAGGCCTATCAGCAGGGCGCCACCTGGGTAAGAAACGATGTCCATTTGTTTGGAAATCTGACCAGAAGGAAGCAG 12640  
Y E A Y Q Q G A T W V R N D V H L F G N L T R R K Q

12641 AAACAACCAGAGTGGCAACGGGCACCAGGACCAGGGAGGTACGGTTGTGTAAAAGCCCTACTAGGTCCAATGGTAAATCA 12720  
K Q P E W Q R A P G P G R Y G C V K A L L G P M V N Q

12721 GCGCCAACCTGACTGGGAAAATAGTGCCTGCAGTAAGTAAAGCAGAACTCACCAGGCTGGAGGAATATGCATTTTCGCAAAA 12800  
R Q L T G K I V P A V S K A E L T R L E E Y A F R K S

12801 GCCTGTGCGATGGCAAAGAAGTAGAGGGGTTTCAATGGATCGGACCTAATAAAATGTACAACAATGGAACCTTGTGAAATG 12880  
L C D G K E V E G F E W I G P N K M Y N N G T C E M

12881 CCACAGGAACATTGGTTGCAGTGTAAATGGGCGCGACTGTACAGTGGCAGAGCTGTACGGAAGAACCGTGCTCGAGGGTAT 12960  
P Q E H W L Q C N G R D C T V A E L Y G R T V L E G I

12961 CGAGGAAGTACCCAAGGAAATAGTGGAGAAGATTGAAGATGGAGCAAAAGCTCTGGGATCAGAGCTTTGGGCGATTATGA 13040  
E E V P K E I V E K I E D G A K A L G S E L W A I M K

13041 AATCACTTCTGCCCTACGCCTTGATTGGAATAGGAGTCGTTCTGTTGGTGCCACTCCTAGGAGGTCTGATCAAGTCGGGA 13120  
S L L P Y A L I G I G V V L L V P L L G G L I K S G

13121 GTCAGGGGACTCTGCAGAAGGGGGCGGAGGAAAGGAGCTACGCCAGAAACCGGGAGGAGTTGGAGCTCCTCCTACGCGA 13200  
V R G L C R R G R R K G A T P R N R E E L E L L L R E  
**Env ORF end** ←      → **Accl1a ORF**

13201 GGAAGGATCACCTCGCGAGTAAAGGGTTCTAATTGCCAACCTGAACCCACAATGGGACCTGCCTGCGTGACGAGGGAGAC 13280  
E G S P R E \*      M G P A C V T R E T

13281 CACGATTAGCATTGAAGCCTTCGACATGACCACAGAAACAGGAAATTGGACTGGATCAACCACAGCACCTCCCTGGCAGA 13360  
T I S I E A F D M T T E T G N W T G S T T A P P W Q I

13361 TTAAGGAGTTTAAGGGAAAAGTCACGGAGTTCGTACCTTGAAGTAATATGGTTTTGTCTTCTGCTGCACGGGGCTCTGG 13440  
K E F K G K V T E F V T L E V I W F V F C C T G L W

13441 GCTGGAAGTCAGGCATTCAGGGTCTCTGCCTTGTTGAAGGAATGGTACGAGTACTGATAGTAAACGTATGGAGAGGTGA 13520  
A G S Q A F R V L C L V E G M V R V L I V N V W R G E

13521 GCCTACATACACCACGTCCTGGTTTCGTTGCCTTCTTCTCGGAAGGCTCAAGATCGACACAACCAAGAGAGGAATTATGA 13600  
P T Y T T S W F V A F L L G R L K I D T T K R G I M R

13601 GAATGATCATTCTAGTCATCTGGCTGGTACTGGACTTGGCCTCAATGTGGTACCCAGTAGCATATTGGGCTAGGCTGGTA 13680  
M I I L V I W L V L D L A S M W Y P V A Y W A R L V

13681 CTAGAAGGACTGGTGGTTGTGGGCTTACTAAGCTACATGTACTCACAAGTCAGCAAGTTGAAAGGCAGCCATGCTTCAAG 13760  
L E G L V V V G L L S Y M Y S Q V S K L K G S H A S R

13761 GTGGGCACTCAAGTTACTTCGACTGTGCCTGTGGGGATTTCGGTTGGGGAATTCTGAGTGTGATGAGTATACTGGAAGTCA 13840  
W A L K L L R L C L W G F G W G I L S V M S I L E V T

13841 CCACCAACCTACCCCTGATCGTCTGGTTCGTGCTGTATGGACATCTGTTTCCTCAACCAGTTCGGAAGGAGCCGGGTAGC 13920  
T N L P L I V W F V L Y G H L F P Q P V R K E P G S

13921 GGTTCGCCCAGGGAGGAAAGAGCCAGGACAGCCGACACCCGACGTTGGACGAGGGGCGTGAACACATGTATGAAGAAGT 14000  
G S P R E E R A R T A D T R R W T R G V E H M Y E E V

**Accl1a ORF end** ←

14001 CCCACTCTGAAAACGAACTGGAAGGCGTTAACCTCGTCACAAAGGCAGCCCAATGCATTTGCAAGCTACAGCTATGTTA 14080  
P L \*

14081 ATGATAATCATCCAATCAAAATTTATGTTACCATGTATGGATAAGAAAGTAAGCAAGAAGTGAAGGGAACCGCCCGTAGA 14160

14161 AGGCGGGGCTAAAGGATATAACCAGCGGAGCATAAGGAGGAAGTGGTCAGTTCGAGATCAGGAAGAGCAGAGGCAACACC 14240

14241 ACAACGAGATGTCGAGCACCACCAGCAACGCAAGTACAATGTCTACAGCAACCACCGCCACCACTATGTTTCATAGGAGTA 14320

 **Acc1b ORF**  


14321 AGTACAATTCCAACCTTATCTCCAGAATTGCACTGAATCCCAAGAACCAGAGATCAAATTTACTAGAATTGATTTCTGGGT 14400



14401 TTTTCGAGTGTATATGGTTGGCATTCTGCTGCAGCGGAGATTGGTCTACAAAGCAACCCCTGAGGATTATAGCCCTGTTTA 14480



14481 TCGGCTTCTTCAAAGCGTTGATGGAAATCATCATGCTGCAAAGAATGAAGATCACCTGTCTCTGGTTTGTTCATCTACCTA 14560



14561 CTGGGACGCACCGACATTGAAACCAACAAGAGAGGGGTAATCAAACCGGTAGCATTGCTGATTTGGTTGCTGCTCGACAT 14640



14641 CGCAGTGGACGTCATTGGAGACAACCTGGAACATCGGATATCTGTTTGAAGGAGTATCACTGGCTGTCTTCTTGGCGTATC 14720



14721 TACTGACCTGGACGTTGGTCAGATATGGGAGGCCAGGATGGTGTGCTGCTTGACCGGGTCATCATTGGAACCATATGGGCC 14800



14801 CTGGGCTGGATAGTCTGACGTCCGCCTGCTGTGCTGGGGCTGAGGCATCGGTCTCCATGGCGGGATGGTTCATGCTGTA 14880



14881 TCCCATCTTCTACCCCGAGTCCAAGCCAGAGTGGCCGGAAGAACCCACCTCCACAAAGGAGGAGCGGCTGGCTTGACC 14960



14961 TGATCGGCAGCAGGGTTCAGGGAGGAGGAACCCCTAGCCTGATCCAAAAGAAGACTGACCAACGCTCTGCTTGCAAGAAAA 15040



**Acc1b ORF end** 

15041 TGAGAAAAAGAGTTGAAAAATGATTAATCATTATTAATTGATTTTGTGTTTGTATTATAGGAGGACGCAGGATGCAGCGG 15120

15121 GTGCGGGGCTACGCTGACAGAGGCCGGCTGTTTGTGGAACCTGGGAATAAGAATGCAATGTTCCAGGTGCTACATGGAGG 15200

 **Acc2 ORF**  


15201 ATCCTCACCCGCATGCAGTCCATGGCGTCTCCAAGGAACAATGACCACACAAGTACCAGTAGAAACGGCTATGGAGCTT 15280



15281 GAGGAGCAAGCTAGAATCATCTGGAGTTCGTTCTGGAACAGAGGAACGACCTGGATAACCACGCGTTGTCGTGGGAGGATT 15360



15361 CTACATAACCGACCTACACCCGAATTTGGGAGTTCGGTGACCGATCCCGCATTCGCACCACCCATTCTTTGGACGGGCGAA 15440



15441 TCCTGATAGCTGGAGCTCGGCAGCTGCCTACACCATAACCAGGCAGAGCCTCGCACACCCCTGTCATCAGTACCACGGTCT 15520



15521 TCAGCGGAAGCTGGGAAGGAACATCGGGACGTAGAGACGCAAACGGACCTCGATGAAGCTGGTGTGGAGGACGGAGACGA 15600

S A E A G K E H R D V E T Q T D L D E A G V E D G D E

15601 GGGCAATGAGGCACACCTGGAAGAGATGGCTGAAGCTGTGGAACAACAGCTACAGGCGCCCCCTTCCACATCGGAGCCCT 15680

G N E A H L E E M A E A V E Q Q L Q A P P S T S E P L

15681 TGGATGTTCCGATAGAGGAGGCACCAACATTGGCAGCCATGCTGGAGCAGCTCGACGCGGCAGAATGGCCACGAGGGGCC 15760

D V P I E E A P T L A A M L E Q L D A A E W P R G A

15761 GCTCTAGGGCAGCAATCGGAGAATCAGCTCGAAAACATGGAAACGCCCAGAGAGGAATATGTTTCTGATGTTTTGGAAAT 15840

A L G Q Q S E N Q L E N M E T P R E E Y V P D V L E I

15841 AATTTCTGATGACTCTTGGGATGGTGTATCTGTAAATCATCGAAAGGTAACCTGCAATCTCAAGAAGGGGGTGTCTGAATG 15920

I S D D S W D G D L \*

15921 AAGTGGGTTGAGGTTGAGATCTTGGTTATTCGATGGCCTGTGCCTGGTACTATGTGGACAATCATAATTCTGATTTATGT 16000

16001 AAAATGATAAAGTTGATTAATGGAATGTAACAAATAATCTGTATGATTTCTAATCAAAGTTGAGAAGAGTGTGTGTAACA 16080

16081 CAGAAATGATTTGAGCACAGCATGTAAAGGAAGTTGTGAAATCTTGGAGAATCACTGAGCAGGGTAAAATGAGGAACTGA 16160

16161 AACCTGTTGCCTAGGAATCAGAAGGAACAGAAGGGAAAACAAGTTAAGAATAGTCTTAACTGGAAAAGTACCAAACAAGC 16240

16241 CATGTATTACAAGAAATGAAGTAATGGTCAAAGCCAAATACCATAATTGGTAATCAAACAGTGGAGTGATAATTTGTCAT 16320

16321 GATGATGTTTTAAAAC TAGGATGTGTCTTAGACTTAAACTATAAAAAGGCGATGCACAGAAGCATCGGGTGAGATTCTAGG 16400

16401 GAGCCCTTCCCAGCACCAGGACGAGTCTACAGATTGGACCAAGCCAACCCAGATGTGGACATTTAATTGACTTTAAACGT 16480

16481 CTTTGTGAGAATTCTCCCTGCATTGTCTAGATGAGGATTGGAAGTACCTAAGCTGTTGGATTTCAAAGAGGATTTCCGAAG 16560

16561 AACAGTAAGGATTATAAAAAGAAGGACAGTCAACTGAAGGGAGTCAACATCTCTCTTTTTGGACTTCTCCTTTTTCCCCC 16640

16641 AACTTCACTGAGGCAGTAACGGACTGGACTTTGGGTGTGGTCGCTTCGGCCGAGTGACTCACTTGAAATTCAGTCTCTTC 16720

16721 AAAAAGGATTTATGGACAGAATTGGACATTTTTCAAGCCCCTTCTTCATCAACCCAGCTCATAAGTAACCATTTTGATTGA 16800

16801 GATTAAGTTTTTGATTTATTCTGTTTTTGAAGTTTAGATTTTGAGCTGATTGTTGACATTCCAGAATTGATTGAGAATTG 16880

16881 ATTTTGAGCTAGATGCAAACCTGCTTGGCTGAAAACCTGCATAATAAAAATTTGACTCTAAAAAGTCAGTATAATTCGTTG 16960

16961 AGAATTAATCCCTTTTTAACGGTACACTTATGTCCATGCAACAGTAAAACCTTAGGCAAGTTAAGCTATAACATCTGGT 17040

17041 TCTATTTTGGACACACTAGTCGTAAGTAATCCACTTCAACTTAACTTATGTCCCTTGGGCTCACTGTCCGAGCCGATAAA 17120

17121 AGAAATCTGGTTCGGTAACAAGCGCACTGATCAAAGGGGCTGGCTGCTATAACTATCTGGGCTGTATTTGGGGTTCGGCTG 17200

17201 CGTGAGCCTTCTGACCGGCAGCATCAGAGTACAGAGGAAGCGGGGCAGATGTTAGGATTATTAGCAGTTAGAGCCAGAC 17280

17281 GAGCAGCCCCGCCACAGCTTAAGTAGTGTCACTGAGCTCAGAAGTGGGTAATACCCTGCTGGCCAAGTGATCAGGACCCT 17360

17361 ATGAAACGGAGTAGCTGTCACAGAGGTAAAATACCTGTGGGATCTAA**CA**

Acc2 ORF end ◀

3'-LTR



# AliFLERV

## 5' -LTR

1 **TGT**CAAGAGACCCGACAGCTCCGGTCATCACTAGAATTGGAACCAGACCTATGGAGCCTTCACTTGACCCCCAGCAGAGG 80

81 AGGGAGTGTGACAGGAAAAGAAGCCACAGGAAGAATCGAGGTGAAGGCCGAGAAGAGAAGAAAATGAGGCGACAGGGAGG 160

161 AGGTGAAATGATTTGAAGTTAATCAATTTTAATGCTGGCAAAAATACATATGTAACCTTGAGTAATGATTATGCTTAATTG 240

241 CAATGTGAATGATTAATACTAATGTACTATGATGATTAATGTGTTTTCAAATGTAAAATGGTGATATAGAATAGAAAAGAATC 320

321 AAAGTGTGTCCTAAGATGAAGGAAGGTTGTGTGTGTGTGCTGTTTTGGACGGTGAAAAGTACAGGGCACATTTCTGGATA 400

401 ATAGGAAAAACAGATGTGTGGGCTTTTCTGGAATGTCCAGAGGCCCTGTGGTGAAAAACAAAGTGGTTTTAACTCACCA 480

481 CAGAAAAAGTCCCTAGCAGTCCCATAGCAGAAAGTCAGCAGGATTACCTCATTCTGGAAAGTACAGAAAAACACATGATG 560

561 GGAAGTCCCCACCCTTCCACAGAAAGGAAGGAGGGGGGCGAACGAGCCCAGAAAGAGTATAAAAAGGCCAAGCAGTCCAGC 640

641 AGTAAAGCGTCTTCTGGCCATCGACTGGAGAAGAAGCAGCAAGCAGCGAGGACATCGAGAGCAGAGGAGCAAGCAGATCC 720

721 GAAGATCATCTCATCTGGGGCAAGCTGACAGATTCCCCTCCGGCGATCTAAGGACCGAAGACCAAATTTGGACCCAGCCCA 800

801 ACTCTGAGAAGTTCTTTTCAGGCAACAATCTGATGCACCTCATGGGGGTAAAACCGACTGCTCTAACCTGTCCTGCCGTC 880

881 TCCAAATTAACAGAAAATGCCACACCACCTAATTAGAAAGATAGGTCAGCATATTAGAGCATTTTATTTTTATCACCATC 960

961 AATTATTAATCAATATTCTTAATCTGTATAATCAAATGTGGCTTTTCTTGCAAATTCCTATTAAACTGCTTACAGCATCA 1040

1041 TAAAGACAAATTCCTGACTGGACATTGATTTTTAAAGTTGTCCTTTAAAGTTTTTCTCTGATTACATGAGAGTTTTGTTA 1120

1121 CTGTAAAGCAACAAGGTAATAACATATTAAGAGTATGGTTGCTTTGAAGCCAAGAGGTAATAAAATGAGGTCATAGATC 1200

1201 ACAAATAAGTTCATTTTTAATGGTTATTAACCTGGGGAGATAGGATAACTCCCCTTTAACAGTTCCTTGAGACCTATTG 1280

1281 TACAGGTCACTAAATCTCATCTCGGCCACAACAAGAAGTGCACATCCTACGAGGGAGCGGCTGCCAGGAACGATAGTGAC 1360

1361 CGGCAGATGGAGGCGTCTGAGCTACTACGCCGACCCAGAGGCCGGGGTTCACGAAGGGAGCGACTACCGGAAGGAGGGC 1440

1441 AGCTGGAGGTCGAGCTCAAGGCTCCCGCCTGATGCCTCCCGGAGGAGACACGTCAGACTCAGCCACACCGGTCACCCCA 1520

1521 GGTGGCTGTAAGTCTGGTCCATCGCCTCCAACCCAAGAGGGAGACATCGTCTCCTCTCCAAGACCCACCAGTGTCCGAGT 1600

1601 GGGTAAACTGGGGGAGGAGCCACAAAGGATTT**CATGGTGCCCAACGTGGGGC**GTGGCCTAAACTAGGACCGCCCCCTGAG 1680

1681 AGAAGGGTTGGACCACAGGAGTGGCCAGCTTGTCTACAAGAGCAGAAAATGAGAATTGACTGCTCAGTGTGCTAAAAGA 1760

1761 GAGCCAACAGCACACATCCTTCACAACACCCACTCGAGGAGTGGGAGAAGGAGAGGACCCTGCAGCAGGAGCTGCTGAAA 1840

1841 TGAACACAGCAAGCTCAGGGTAAGTAGCTACAATCGTCGAGACCCCATCCCGTCTGTAAACGCGTGCAGGAGGCTTTGA 1920

1921 GGATCGACAACCTCAATCAAGACAAAGAAGCACA**ATGGCTGCTGTAGCCTTGCCAGAGAATGAGGAGAAAAGCGGGGACAT** 2000

M A A V A L P E N E E K A G T S

2001 CACAAGAAACGGCCCCGACCCAGAGCCCAGACCAGCCCCGCCATGCATAGTTATGCTCTATGGCAGAGGGACCAAGGAG 2080

Q E T A P D P E P R P A P P C I V M L Y G R G T K E

2081 TGGCACCCACCCTAAGGCGCTCTTCATGTACATTCCACAAAGACAGACCCAGTGCAAGCCCTGGCTGAACTGGAAGA 2160

W H P T A K A L F M S H S T K T D P V Q A L A E L E D

2161 CCACATGACCAAAAACACATTCTTCTTTGGGCCACCCTGGTGGATGGGGCCATGCTAGCCGTGCTGCTTCATCCACCAG 2240

H M T K N T F F F G P T L V D G A M L A V L L H P P E

2241 AAACCAAAAAGAAGGTTTCAGAAGGAGGAATGGGTCAGATGGTGGCTGACAACAGTAAAAGGATGGAAAACCGACGTGGTG 2320

T K K K V Q K E E W V R W W L T T V K G W K T D V V  
2321 AAGCTGGTAAGCCCGTCAGCAGAGTATGACCCCTGGTAAAATTGGTTGCCAGGGAACAGTTCATCAACTGCATAGTGGC 2400  
K L V S P S A E Y D P L V K L V A R E Q F I N C I V A  
2401 CGATCCAGCATCCAAACCTGAGAAGAAATATAAGTGTCTGGAGCAGCCTCTGTATGAACTCAGGTTATGGAAAAACATGT 2480  
D P A S K P E K K Y K C L E Q P L Y E L R L W K N M L  
2481 TGAAGTACAAGGTCAAAAATGAGTATGAGGATGAGACCAGTGTGGTCGGAGATCCCGACACCAACACTGACCACGAAGAA 2560  
K Y K V K N E Y E D E T S V V G D P D T N T D H E E  
2561 TCAGGCACGGAGACTGATGATGAGGATGAGGATGATAAGAAAGGAAAACAAGATGATGAAGATTCTTTTCGATTGGAAAAGA 2640  
S G T E T D D E D E D D K K G K Q D D E D S F D W K D  
2641 CGGAGATTCTTTTGATGGTAAGGAAAAGGATGATGATGATCGATCCCCTTTTCGCAAAGAGATAGGAGAGCTGACTCAGG 2720  
G D S F D G K E K D D D D R S H F R K E I G E L T Q A  
2721 CTTTGCAAGATATAAAAACGTACCTGGGTCAAACCCCAAGTCAGAACCAAAAATGATGGAAACCAGAACACTGTGAAG 2800  
L Q D I K T Y L G Q T P K S E P K N D G N Q N T V K  
2801 GCTTTGACTAAGCAGTTTGAAAACACCACCCTCAATGAAGGTGACAAAAACATCGGAAATGTGACCGCAAACGGCGTCA 2880  
A L T K Q F E N T T L N E G D K K H R K C D R K R R H  
2881 CATAGAACCAGGGATACCGGGGCGAGGCCCTTAGGCCCTCTCTCTGAAGAGACCCTGAAGATTGCAATGCAGAATGGTA 2960  
I E P G I P G R G P L G P L S E E T L K I R M Q N G I  
2961 TAGTCCTGCATCAAACCTGTGGGAGACCCATGGGCCATCTCAAGTGTGACTGCTGATATTCACCGACCACAACACTACAAA 3040  
V L H Q T V G D P W A I S S D G L L I F T D H N Y K  
3041 AGTTACAATGCAAATTCAGAAAAGCCCTGATAAAAAATGCGGGGCATGAATACCAGGAAGAGGTAAGGGAGTTAAGAGA 3120  
S Y N A K F R K A L I K N A G H E Y Q E E V R E L R E  
3121 AACCCACAAAAAAGATCCCGATCGACCCCAATGACTAGTGGAGCCGGACTGGCCCACTATGGAATCATTTCATGTCCCAG 3200  
T H K K D P D R P Q M T S G A G L A H Y G I I H V P V  
3201 TACTTGCATATAAGAAAGGTGATGACATGGAAAACCTATGTCCGCCTAATGATGAAAAAATTGGAACGAGGTTTGTATCAC 3280  
L A Y K K G D D M E N Y V R L M M K K L E R G L Y H  
3281 ACGGTACATCAAGGACTGAGGAGAGTCGTCATCAGCACCTGTGGTTTGGAGTCTGGAGATCTCCCATGGGACATGGCAGA 3360  
T V H Q G L R R V V I S T C G L R S G D L P W D M A E  
3361 AAAGGTGGCAGTGAGAGGCTCAGCGCACTTCGCTCAGAACCTCAATGTGCCACAGACCTGAAAGAAATCGTCTGTGGTCA 3440  
K V A V R G S A H F A Q N L N V P T D L K E I V V V T  
3441 CAGCAGAAAAGCTGAAAAGTAAAAGGCTGAATAAGGCCATGCCAATGATACCCATAAAAACCTGAGCCCATGCAGGGGGAG 3520  
A E K L K S E R L N K A M P M I P I K T E P M Q G E  
3521 GGGAAGAAGGCCCCCGTCAAAGAGACCCCATCAAAGATACCCCGCCCAAAAAGACTGAACAGGGTCTCAAAGCTTCAGA 3600  
G K K A P V K E T P I K D T P P K K T E Q G L K A S D

3601 CACAGAAAGAGATAAACCATTTGGAAGGACCTGTGTGCAGCACCCAAAACAAGAGGACATTGAAGAACTCGATTTGGTCAG 3680  
T E R D K P L E G P V C S T Q N K R T L K N S I W S E

3681 AGGAGGAGAAACAGGACCTAATTCGACACTTCAACAGGTGTGACACCAGCTCTGGAAACGAGAGCTCAGAAGAGGAAGAA 3760  
E E K Q D L I R H F N R C D T S S G N E S S E E E E

3761 CCGGCGAACCCCCCGGCCTGTTGAGCGCCCACAAACCCCGTACCCCATGAAAGCTCAGAAGAAGACAACGATGACTC 3840  
P A N P P R P V E R P Q T P V P H E S S E E D N D D S

3841 CAGCATGGGGTCTGCTGCAGCACAAGGTCAAGGTACCCCTAAACAATAAGGGTTCGGACAAAGAAAAGGAGAAAAGAAGC 3920  
S M G S A A A Q G Q G T P K Q L R V G Q R K G E K K Q

3921 AGGTGGAACCTGGTGGATGTCCTCCGGGTGTGAGAGAGAATGGCACGAGAACCAGGTGGGGACCAATCCAGACCAGTGAT 4000  
V E L V D V L R V S E R M A R E P R W G P I Q T S D

4001 GGAAGAAGAACCTATGTGCCTGAAGCAGATCAGAGGGACTTCCCAATACCCCCAGCGTGGGCTGAAAAGATGGAGGAACA 4080  
G R R T Y V P E A D Q R D F P I P P A W A E K M E E Q

4081 ACTGGAAATAAAGGTAAAGGCCAAAGTGGGGGAATGGGCTAACATAATAATGATGCCATCTTATCCCACTCTAGCTGCAC 4160  
L E I K V K A K V G E W A N I I M M P S Y P T L A A H

4161 ACAAAGATTGACAGCTAACTTCAGGCAAGCATATGTGGCCATTGCCACGATGTGATGCTGAAAAAGATGAAGAGAGCA 4240  
K R L T A N F R Q A Y V A I A H D V M L K K M K R A

4241 GCAAACAAGTTCGTGAGGGACATGGTGTATGAAGAGGAAGATGGGATGCTCTCGGACGAACCAGTACCGCCAGTAACGGC 4320  
A N K F V R D M V Y E E E D G M L S D E P V P P V T A

4321 CGCAGGTGAAAAGGACTCATCAGGAAGGCAGGAGTGGAAATCAATTAAGATGTGAGCACCAACGCAGATGAGTTCCGTG 4400  
A G E K D S S G R Q E W K S I K D V S T N A D E F R E

4401 AGTATAAGAAAATAAAAACCCTGGTAAGAGAACCAGGTGCAGGCGAAGGAAAAGAAAGCTATCTAAAAGATGTCTGGCCC 4480  
Y K K I K T L V R E P G A G E G K E S Y L K D V W P

4481 CTCGTCGTGAACCTCCACTGACTGCGAGGCCGCAAAGCGCCTGTGGCTGAGTCATATCACAGGCCATCCCATCGACAGAAA 4560  
L V V N S T D C E A A K R L W L S H I T G H P I D R K

4561 AGACTCGGCTCAGGACTACTATGAAAAATTTGTACCTGAAGATGAAAATGATGAGGATGCCACATTGACAGGGCTCGAC 4640  
D S A Q D Y Y E K F V P E D E N D E D A H I D R A R L

4641 TCAGACTGGAACAAGGACAAAAATTAACCCCATCTGGCATCAGCTGAAACAAAACATCGCCCCAACAGGTATGTGAAG 4720  
R L E Q G Q K L T P I W H Q L K Q N I A P T R Y V K

4721 GCCCTAAGGATGGTGACAAAGGGACGAAGGGGTGACATAACTTTTGCCACCATGCCTATCCCAACCACCACAGTGGCACA 4800  
A L R M V T K G R R G D I T F A T M P I P T T T V A Q

4801 AATGGATGCAGCAGTAAGGAAGTATGACCTGGAACCTGCTCTATTGGGATGAAAGAAGAAAAAAGGAGTCAACCCCGAAGC 4880  
M D A A V R K Y D L E L L Y W D E R R K K E S T P K P

4881 CACCAAAAGTCCCACCAAAGCGGCCCTGAAGGAGCCGGCCAATCCCAGGGTAAATTTTCATCAACCAACCCCTCAGCAG 4960  
P K V P T K A A L K E P A N P Q G K F H Q P T P Q Q

4961 AGGGACAAAGGCCCCAGACAGCAGTACCAGCCAAACAACCAAGGACAACAATATAGGCCCCCGCCACAACGACAGCAAGG 5040  
R D K G P R Q Q Y Q P N N Q G Q Q Y R P P P Q R Q Q G

5041 ACCGGAAGAGGAGGTCCGGCGACTCGGCCTGCTCAAGGCCCCAAAAGAGCCCCTTACTTGCCCCAGAAGAGTACAACA 5120  
P E R G G P A T R P A Q G P K R A P Y L P P E E Y N K

5121 AATTGACCCCAGAACA AAAAGATGCCCTCCGT CAGGCCAGGGAACAAGTGGCCGGAGGGCCGCAAAAATGATGGACCCCA 5200  
L T P E Q K D A L R Q A R E Q V A G G P P K \*  
M M D P R

Gag ORF end ← → Pol ORF

5201 GGTCCCGGGTACCCTGGAAAACACCTACTGGAATGGGGACCACATCTTACCAATGTAGATGGGACTCTCTTCTGGTG 5280  
S R V T L E N T Y W N G D H I F T N V D G T L F L V

5281 GATACAGGGGCAGAGGTATCCATGACCCGGAGAGACCTAGAGACTGAAGGGTACCTGTATGTTCAACTGGCTAGTGGAGC 5360  
D T G A E V S M T R R D L E T E G Y L Y V Q L A S G A

5361 AATGGAGGAAATGCCATATGGAATTTGGA AAAATGTGATATGGTTAAAAGGACCTTATAATTTGGTAACGGTCAAAGACT 5440  
M E E M P Y G I W K N V I W L K G P Y N L V T V K D L

5441 TGAAGATCCTGCATGACCCCGAGGAAGCTAGGAAATCAGAATGGAAAAGATTGGAGATGTTAAAATCAAAATCAATAAAA 5520  
K I L H D P E E A R K S E W K R L E M L K S K S I K

5521 ATAAGCCCCTCAGCCACCACAACGTGGTACAAACCAGTGGATGTCCCTGAAGTAACAAAACAAAAGTTGGAAGAAAAGTGA 5600  
I S P S A T T T W Y K P V D V P E V T K Q K L E E S D

5601 TTTGTCCCCAGAAGGAAAGATTA AATTA AAAACAATAATTGAATCAGCCAGAATTGCTCGCTTCAAAAATGACTGCGGAG 5680  
**Aspartic protease**  
L S P E G K I K L K Q I I E S A R I A R F K N D C G D

5681 ACTTGGGCACAAAATTTTGCATCATATCATAGGAGGGGTACACCCACCTGTAAAACAGTACCCTCTCCACCCAGAAGCA 5760  
L G T K F C H H I I G G V H P P V K Q Y P L H P E A

5761 GTGGCAGAAATGGACAAAATTG TAAAAGAACTGCATGCACTGGGAATCATCAGAGAAGAGCCAAATCCCCTCACAAATAG 5840  
V A E M D K I V K E L H A L G I I R E E P N P L T N S

5841 CCCTATTCAGGCTGTGAAGAAACCTGAATCGGC GGGAGGAGGCTGGAGGCCAGTGATCAATTTCAAGGCCCTAAACCGGA 5920  
P I Q A V K K P E S A G G G W R P V I N F K A L N R R

5921 GAACTGTGCAAATCGAGCCAGCCTCATCAATCCCCAAGGAGCATTAAAAACTGAGAGTTAAAAAGTACAAATCTTGC 6000  
T V A N R A S L I N P Q G A L K T L R V K K Y K S C

6001 ATCGACCTGGCTAACGGGTTTTTCTCACTCAGGTTAGCCCGTGAATCACAAGGAAAAACAGCTTTACCCACAAAGGTAA 6080  
I D L A N G F F S L R L A R E S Q G K T A F T H K G K

6081 AAGCTATGTGTGGCAAAGACTGCCACAGGGATACAGAAACTCACCAAATGTATTCCAATCAGCCGTCTTGAAATACTTG 6160  
**Reverse transcriptase domain**  
S Y V W Q R L P Q G Y R N S P N V F Q S A V L E I L E

6161 AAGATGTTGGAGCTTCAGTGTACATCGATGACGTTTTTCATTGCAGATGACACTGAAGAAGAGCACCTTAAACGTCTGGAA 6240  
D V G A S V Y I D D V F I A D D T E E E H L K R L E

6241 GAAGTGGTTAAACGGATCTCTGCAGCAGGCCTCAAGCTAAACCTGGCGAAATGCCAGTTTGGCCAGTTTAAAGTCAACTA 6320  
E V V K R I S A A G L K L N L A K C Q F G Q F K V N Y

6321 CCTGGGGTTCCAAGTCACCACAGACTTGGGCTTATCAGACGGTTACAGAGAGAAAATTCAACAAATACAACCCCCCAGAT 6400  
L G F Q V T T D L G L S D G Y R E K I Q Q I Q P P R C

6401 GTGAAAATGATCTACAGAAAATCTTAGGCCTGTGCAACTATGTGAGAGATCACGTACCAAACCTACCAGAAGTATGCAAAA 6480  
E N D L Q K I L G L C N Y V R D H V P N Y Q K Y A K

6481 CCCTTGATGCATGCCTGAAAAAGAGGCTACGACAGAAGGCCGCAAGGGAAAAGCATGGTCATGGACACCCAAAAACCA 6560  
P L Y A C L K K E A T T E G R K G K A W S W T P K N Q

6561 AGACGATCTTGACAAGCTGAAAGAAGAGATCCAGAAAGCTGTGCAACTTAGAACCTAGAAACCTGACCTCTAGGCTGGTGG 6640  
D D L D K L K E E I Q K A V R L E P R N L T S R L V A

6641 CAGAAATATTCTGCGAGAACGAAGACGCCATGGTCAAAGTGAGTAATGATCAAGGAGGCCTAATCACATTGTGGAGCACA 6720  
E I F C E N E D A M V K V S N D Q G G L I T L W S T

6721 ACGCTGACATCAGTGGAGAAGAAATACCCCCAAGAAGAGAAGGAACTGGCAGTGTTAGCAAAATATTGGGGGTCCTAAA 6800  
T L T S V E K K Y P Q E E K E L A V L A K Y W G S L K

6801 AGATCTGGCCCAAGGTCAACCCATCAAAGTCACGACTCAAAGTCAGGTACACAAATACCTGAGAAAAGGCACCATCGAGA 6880  
D L A Q G Q P I K V T T Q S Q V H K Y L R K G T I E S

6881 GCACAAGAGCAACTAACACCAGATGGGGCCGATGGGAAGACATTTTGTCTGGATCCAGACCTAGAAATAGGCCCGGCACAG 6960  
T R A T N T R W G R W E D I L L D P D L E I G P A Q

6961 TTACAGCAAAGAAGCCTACTGCCAGTCAGACTAAGGATAAAACATATGACTGGGTGCTCTTCACAGATGGATCACGAAA 7040  
L Q Q K K P T A S Q T K D K T Y D W V L F T D G S R K

7041 AGGCCCTGATGAAACGGCATATTGGGGTTACATCTTGACACAAAATGGGAAAGAACAACACAGAGCCAGAGGAAAGGTGA 7120  
G P D E T A Y W G Y I L T Q N G K E Q H R A R G K V S

7121 GTGGAAGCGCCCAAGCTGGAGAAGTGACGGCGTTTTTGAAGGGTTGCTGGAACCTACCAAGAGGAAAATCAAGGCCGCA 7200  
G S A Q A G E V T A V L E G L L E L T K R K I K A A

7201 AGGGTAGTAACTGACAGTTACTATTGTGCACAGGCCTTGAAAGAAGACTTGTCCATCTGGATTGAGAATGGATTTGAGTC 7280  
R V V T D S Y Y C A Q A L K E D L S I W I E N G F E S  
**RNaseH domain**

7281 AGCCAGAGGAAAACTGTTGCCACAAAGAAGCTTTGGGAAAAAATAGCCGAGTTAAGGACACAACCTCGACTTAGACGTGG 7360  
A R G K T V A H K E L W E K I A E L R T Q L D L D V E

7361 AGCACAAAAGCGCACACAAAAGAAGGATCTTACTGGGAAGGAAACGACGAAGTGGACAGGTTTGTCCAACAACGGAAA 7440  
H Q K A H T K E G S Y W E G N D E V D R F V Q Q R K

7441 ATTGTCTTGATTGGAGCAGAAAATGGAATGTTACTCCTAAAGGAAAGGAGGTTCCAAAAGAGTACGTGGCGGAGGTAGT 7520  
I V L I G A E K W N V T P K G K E V P K E Y V A E V V

7521 GGTGACCATGCATGAGGCTCTAGGACATGCTGGGCTGCTACCCACACGTAGAGGACTGGTAAAGCAGAAGCTTATGGATTC 7600  
V T M H E A L G H A G L L P T R R G L V K Q N L W I P

7601 CTATGAAGCAGATTCAGCAAGTACTCAAACGCTGCACGGTATGTGGGAAATACAATGCAGGAAGAAGAGGAAAAAGAACT 7680  
M K Q I Q Q V L K R C T V C G K Y N A G R R G K R T

7681 GAGGGCCTCACCATTAAGCACAATCCCATGGGGCTCAATATGCATGGACGTAGCTGGACCCATGGGGGTACAGGGAC 7760  
E G L T I K S T I P W G S I C M D V A G P M G V T G T

7761 TAAAGGTGAGAAATATCTTATTGTCCTTGTAGACTCAATGTCTGGCTTTGTGGTGGTGAGACCTGTCAGGAAAGCCAACG 7840  
K G E K Y L I V L V D S M S G F V V V R P V R K A N G

7841 GGAATAGTGTGTCTCCATGTTAGACTACACATGTGCCTGTTTAGGCATTCTCGAGAGCTACGAACCGACAATGGAACG 7920  
**Integrase core domain**  
N S V V S M L D Y T C A C L G I P R E L R T D N G T

7921 CATTTTAAAAATGTGCAAGTGAACAGGTGGTGTGAGCAACATGGGGTGTATGAGGGTATATTCACCGCCATACACGCCACA 8000  
H F K N V Q V N R W C E Q H G V M R V Y S P P Y T P Q

8001 GGCCAACGGCGTTGCTGAATGTACCATCGGTTTGGTCAAAAATGGCTAGCTAAAAATGCTAACTCAAAGGAATGGAGCC 8080  
A N G V A E C T I G L V K N W L A K N A N S K E W S L

8081 TCAAGTCGGTCGACATAGGCCGAGCCCTCAACGACCGGGACCGAGCAGGAAGGCCGTCGCCCTTCTGACGAACTAAACCAG 8160  
K S V D I G R A L N D R D R A G R P S P S D E L N Q

8161 CGTCCCTTTGTCACTGAGGAAACAGGGAGGAGTCAGGAGGCGGACCCAGCCCCCTTAGAGGCATGCCATTTCGCTGTGGG 8240  
R P F V T E E T G R S Q E A D P A P L E A C P F A V G

8241 ACAGAAGGTGTGGCTTAAAGCCAGAGACCAACCCAGTACGGGGGCGAGTAAAGCCAAAGTATGAAGAGGTTGACACTGTGA 8320  
Q K V W L K A R D Q P S T G A V K P K Y E E V D T V T

8321 CTAAAGTGTGGACCAGAACACAGTGTCTGCTGAAGAAGAAAGGAATCCAAGGAGTTGAGCAGCTGAAACCAGCCTTAGGT 8400  
K V L D Q N T V L L K K K G I Q G V E Q L K P A L G

**Pol ORF end** → **Acc3 ORF**

8401 TAAAGGAACCAGAAATGAACATGGCCATGGACCTCAGCAACTCTCCACCGCCCTACATTCGACTGGCCACGATTAACGGGT 8480  
\* M N M A M D L S N S P P P Y I R L A T I N G L

8481 TGGTAATCATGAGAAGAACCACATTGGGTATTTGGGTTGGCAGAGCCCTAAAGACCCTAGAATATGCAAAAATTGGTTAT 8560  
V I M R R T T L G I W V G R A L K T L E Y A K I G Y

8561 CTGTCACCGGATCCAGAAACAGTGAATGGAACCACTGTAATGTGGGATGTGTGGTTTGCCTGCAGGCAGGAAACTTTGA 8640  
L S P D P E T V E W N H C N V G C V V C L Q A G N F E

8641 GACCGCCTGGGTTGGACCCGGCCACAAGAAACCACTCTCCCCTCCACGGTCAAACGTTGACCTCATTGGAATCAGGAGAA 8720  
T A W V G P G H K K P L S P P R S N V D L I G I R R S

8721 GCCCAGTGAAGGTGCTGGATGCCTTCATCTGTGGAACATGCAGAGTTGACACTCTGCCAGAATTACCTTTGTCGTCCAA 8800  
P V K V L D A F I C G T C R V D T L P R I T F V V Q

8801 TGGGACCGCAAAGGAGTGCTGCCCGAGGGATGTGGTTGTTTCGTGGGATGGTCACCAACTGGAGTGGTGTCCCTCATGTTT 8880

W D R K G V L P E G C G C S W D G H Q L E W C P S C S  
 8881 ATCCCTAGGCTGCCATGGAACCCTGGTCCAAGCGGCTGAAGCTCGTGGATGGCAGGTGCGGCGGCTCTTTTACCCCCTCA 8960  
 S L G C H G T L V Q A A E A R G W Q V R R L F Y P L R  
 8961 GGTACTTAACACCAGATGAGACCGCTGACGCTGTTGCATCCTCCATGGGCCTCGGTCCCCTTCTCTACCCTGAACTCTCC 9040  
 Y L T P D E T A D A V A S S M G L G P L L Y P E L S  
 9041 TGTGATCCCTCTGCACCCCCTTGGATCCTGTCACTGATGAGAAGGAGGAGGGAGACACAGAGGCACCCGAGGACCTCCG 9120  
 C D P S A P P L D P V T D E K E E G D T E A P E D L R  
 9121 CTGTGACCTGTTGGACGAAACCATCGACAAATCTTGGCCCTTTCAAGCGGCCGGGATTCGTGCAGGAAGGCCCTTGCTGG 9200  
 C D L L D E T I D K S W P F Q A A G I R A G R P L L G  
 9201 GACTACATGAGTACCCTTTGGTTTTTCAGGGTTTATAGAGAACCTTTAACATTGGCCCTCAGACCTGACGACAGGCCAGAT 9280  
 L H E Y P L V F R V Y R E P L T L A L R P D D R P D  
 9281 GATGTAAGCGACTGCACAAGAAGGCGGCTGGGAAGGACCCTGGGAGCTCACCACATGGGCCTCCCTAATAAAGAGGT 9360  
 D V K A T A Q E G G W E G P W E L T T W A S L I K E V  
 9361 TATCCAGAATCAGTTCATCCCGCTGATAGACCTCCACCTATCCCTCGTGAGGAGAGGGTCAGAATGTCTGACCTATACT 9440  
 I Q N Q F I P L I D L P P I P R E E R V R M S D L Y Y  
 9441 ACTACACCACCAACATTGATGCTTGGTGTCCGAGAGGAGCTCGCCCCAAGCAAAGGTTGCAACATACACTGTACCTCT 9520  
 Y T T N I D A W C P R G A R P K Q K V A T Y T V T S  
 9521 GAGGCGTGAATCGGCAAGGAGTTCTACAGATCCCCGGGACCGTGGCTCAGAGAACTCCAATTCCCATCCGCCCTGATTC 9600  
 E A W N R Q G V L Q I P G T V A Q R T P I P I R P D S  
 9601 CACTTACAAAGTGCAGGTGCGAGTTCAAATGGTGATTGTCCCCCTTAAAGGGGTTTATTCCATTGGAGCCACGATCACTG 9680  
 T Y K V Q V A V Q M V I V P L K G V Y S I G A T I T V  
 9681 TTCTTGGACGACATGGTGAGGTGGTCAACACAGATGGGGCCCCTGTCCCGCTCCCTGAGGCTCCCGCCCCACCACCTCGC 9760  
 L G R H G E V V N T D G A P V P L P E A P A P P P R  
 9761 CGCCACTCTGGCTTGCTCTTTAGAGCCCTAACCCGCGTCCCCTCGCGGTTGCGCAGGGTGAAGAGCGAGACAGAATAAAT 9840  
 R H S G L L F R A L T R V P S R L R R V K S E T E \*  
 9841 TAATGGTGCTCCAGTGAGATGTACGGTTTCCCCTTCATTGACTTATGATATATTTTTCTCTTTCCTTGGGATTGGCTGT 9920  
 9921 GGGATGATTGACCTCAATAATCCCAGGAGAGGGGGTGGGGCCCTGAAGATGAGGAAGGACTGATTGTAACCACACCCAC 10000  
 10001 CAGAGGAGAAACCCCCCCCCTATAAAGATAAAAAGCCTGTCTGTGAGCTGCACAGTAACAGAAAGAAGATGGAGAGGA 10080  
 10081 TCACCTACATGTCACAGACCCAGGAAGACCCAGAGGACAATGACAGGGAAACCGACCTCACAAAAAACCCCTTCCCAA 10160  
 M T G K P T S Q K N P L P K  
 10161 ACACAGCTGCGGCTGCAGCTGTAAAAGAAGCCATGTCTGCAGACTGGTTTAAGGCTTTTAGCTTTGTTTCTTGCTGTTG 10240  
 H S C G C S C K K K P C L Q T G L R L L A L F L A V A  
 10241 CTTTAATTTTGTCAATTTTGTACCAAGCAGGATACCAACCATGGAAAGTCACTCATGCCAGAGTGTTCATGCCAACACA 10320  
 L I L S I L Y Q A G Y Q P W K V T H A R V F H A N T

Acc3 ORF end ←

→ Env ORF

10321 AAATATGGAAATTTGACTTGCTGGAACACCAGCGCCCGCAACCTCTTCATGCCCTGGGATGCAAACCAAACCTTCTGAGAA 10400  
K Y G N L T C W N T S A R N L F M P W D A N Q T S E N

10401 TCAAACCTGACTCCTGGAACAGGATAAAAAGAATGGGTTATGAAGCATGGCGAGACAACCTGTATGATTGGACTGCCTGGA 10480  
Q T D S W N R I K R M G Y E A W R D N L Y D W T A W T

10481 CAGATGAACTGGCAGACAAAACCTTCTCGACGGACCACAGATGGACAATCTCAAATCTACTGGCAACTAAAGATGGATTG 10560  
D E L A R Q N F S T D H R W T I S N L L A T K D G L

10561 GTCGTGTGGGTTAAGGTATTAGAAGATCATGAGACTAAAACGACGAAGTGCAACTGGATACAGCCAGAGGGAGAACCACC 10640  
V V W V K V L E D H E T K T T K C N W I Q P E G E P P

10641 CGAATGGCACTGTGATTGGGGATGCAGGCCCTGCTGGGCCTAGCGCACCAAGGGTACTGGCAATATGAAGCTGTATTTTC 10720  
E W H C D W G C R P L L G L A H Q G Y W Q Y E A V F P

10721 CAGCACCCACAAACACATATTCTGCCCGGCCATATTTCCAAGATGGGAATTTTGGGGACACTATGACCTCAAATGTGAC 10800  
A P H K H I F C P A I F P R W E F W G H Y D L K C D

10801 AAAATCCCAGTCACAAACAGAACCAGAATTAGACCACAAAGAAAGCACCCGACAGCCTATAAAAAGATGCCCAGAAGGTC 10880  
K I P V T N R T R I R P Q R K H P T A Y K K M P R R S

10881 CATACGCCCAATAAAAACCTGGCAATTATACTGTAACGGTGCAAACCTATAATAATGAGACTACCAATGCAACGGGAATTG 10960  
I R P N K T G N Y T V T V Q T Y N N E T T N A T G I E

10961 AAGCACAAACCACTCCGCCCCAGGTACCACTCCGGCCCCAGCCAGGACCCAGAGAAATACAACACCGTGGATGAATGC 11040  
A Q T T P P P G T T P A P A Q D P E K Y N T V D E C

11041 TTAGCAGACATCACACGCCTCGACTCCTGCATCTGGAACACGTGGGTAAAATGTAAAGGCCAAAACCTTTATGCCCTGGG 11120  
L A D I T R L D S C I W N T W V K C K G Q N F M P L G

11121 CCCGCTGTGGTTCAGACTTACTATTACACTAGCTGGAGATCAATTTTCAGTCTACCAGGGCTATGCATGAGGAATGGC 11200  
P L W F Q T Y Y Y T S W R S I F S P T R A M H E E W L

11201 TAACTATACCTTCCCATGGATATGGATCAAAGAGGATGTTGTTCACTATGAAGGAGATTTCCCTGAAGGGTCTACTAGG 11280  
N Y T F P W I W I K E D V V H Y E G D F P E G S T R

11281 AACCGTGGAGGGCTTAAGGGCCCTTACCGGTCACACATGTATGTCCAAAATTGCCACTGTCCAAGAGTTAAAATCAGT 11360  
N R G G L K G P Y R S H M Y V Q K L P T V Q E L K S V

11361 ACCCAAAGGAGATTTTGACAAAATAGACAAATGTGTTGCTAGAAGAATTTTCCTCAGCCTCAATGATTCTGAATGGGAAG 11440  
P K G D F D K I D K C V A R R I F L S L N D S E W E G

11441 GACATGGGGCCTCCCCTAGATGTAAACTGTGGCAGGTTGATATCTCCTTTGTGTCAACATGGAGGTATGACTGCACAGGC 11520  
H G A S P R C K L W Q V D I S F V S T W R Y D C T G

11521 ATCCTGAGGTACAACAGCACCAAAGAACTGCTGCAAGGATGGGTTGAAGGACACAGCAGAGATAAAACCCGGACATGGTG 11600  
I L R Y N S T K E L L Q G W V E G H S R D K T R T W W

11601 GGGGTTTCAAAGAGAAGAAATGGAACACTGGGTGATCCCCTGCCTGTCCCAATCCGACAATTATTGGGTAAAGTATCAGT 11680



G F Q R E E M E H W V I P C L S Q S D N Y W V K Y Q Y  
 11681 ATATTGCAACGGTGTATTCAAAGAGCATGATATCTGGTCCTCAGCAATTTACAGACCAGACAGGTATGTCCGCCCCAGA 11760  
 I A T V Y S K E H D I W S S A I Y R P D R Y V R P R  
 11761 CCATGGAATGACCTGTATCAAAGTGGGCACGCTTGCACAGTAAGTCTGGCACGAAGACCCTGCAGTGAACCTACCAGG 11840  
 P W K L T C I K S G H A C T V S L A R R P C S E L P G  
 11841 CTGGGAAGGTTATTGTGGAAGTTTTTATGCAGACGATTATAATACTCATGAGGCTGCGACAGTATGGACCAAGACACGAC 11920  
 W E G Y C G S F Y A D D Y N T H E A A T V W T K T R P  
 11921 CAACAACCTTATACAAAATTGATATCAAATGCGACCAACACATGGCGTTCGAGCCATGGCCTGCGATCACTGTGTTAATGCC 12000  
 T T Y T K L I S N A T N T W R R A M A C D H C V N A  
 12001 ATCATAGGACCCACATGAAGTCCCGGAAGAGTATTGCTGGTGAATTATCCCCTCAGTTCCTCCGACACTATGATCACAAT 12080  
 I I G P H M K S R K S I A G E I I P S V P D T M I T I  
 12081 AGCTGAGAGTCACGCTTTCAGAAGAGGGCTGTGCCTAGGCCTTGAAGAGGAAGGATTTGAGTGGGTAGGGCCAAACCTAC 12160  
 A E S H A F R R G L C L G L E E E G F E W V G P N L L  
 12161 TCTACTCTAACCTCACATGCAAATACCCAGAAGAAGTTTGAAGAAATGTGGCCCGGACTCCGACAAACACACCTGTGCA 12240  
 Y S N L T C K Y P E E V W K K C G P D S D K H T C A  
 12241 TGGTATGAAACCCTGCAAACAATGGCCCTCAGAGAGGTAAAAACCCTGGCAAAGGGGCCATTGAAATTGTTGCCGAAGG 12320  
 W Y E T L Q T M A L R E V K T L A K G A I E I V A E G  
 12321 AGCAGGAGCAGTTGAGGAAGGTATGGTGGAGTTGTTGGAAAAGATTTGGCCATACTGCTTGACGGTCTTGGCATCCTGA 12400  
 A G A V E E G M V E L L E K I W P Y C L T V L G I L I  
 12401 TTGCTGCTGTCTTGGCATGCCTGGCTCTAAGAGAATTGTGTCTCAGAGCCCTGCCCCAAGGAGGGGTGAGTACAAGCCC 12480  
 A A V L A C L A L R E L C L R A L P P R R G E Y K P  
 12481 **Env ORF end** ◀ CTTCCTTCAAGGTAGAGAGTAACTGATCCTATATAAAGCTGAGAGCACATAGCCTCAGTACGCAGTATTGCTATCGCTTTC 12560  
 L P Q G R E \*  
 12561 TTTAAACGCTGCAGAAACGCTATGAGAATTAAGATTGGAGTTAGAGACTGGGATTATGGGAGCATAAAAATTGACGGTGGGA 12640  
 12641 AGTAGATCCAACCCATCGAGAAGACCTCCTGACAGTTGAGTATTGCAATCTCCAGGATTATCGTTATCGTGTCTACCCCT 12720  
 12721 CAGTAGACACAAAAGAAGAGTTCCTGGATTTGTTCTGTCTCAGGCCTTGAATAGCTGGGCAAGTGTGGATTGGCATCGCCAG 12800  
 12801 CATGAATTTCTGGCGAACATTTTCATGAATTAGGAAAAATTGACCTCTGCCCAAAAAATGAAGATTATTATGGAAAAGAG 12880  
 12881 ACAATGGGGGCGAGGAGCTCCGAAGATCAGTGTGAAATAGATCCAATCTACCCTGAAGAAATTTCTAATTTTGGATTATC 12960  
 12961 ACGTTGGTCTTATTGGTTCAACAGAAGATATCGAATGTCATCTAGGAGAAATTTGTTGGAAATGACGGCCGGGACAATG 13040  
 13041 AGAATAATCACCGCAAATCAAGAATCATTCTCTATGAAATAAGAGGCCACCATTTTCAAATTTGACTGTAAGGCCAAAA 13120  
 13121 GAGGAGGGGACTCGAACCCCTCCCCTCCCAGAGGAGGAGTAACAGTACCAGATAAAAATAGGAAGACCCGAAGCCAGAACA 13200  
 13201 AACTTGAACCCACTCAGCAACGGAGGACGATGCACATCACGATCCAACAGAGTCATTTTACCCTGACCCGAACCTACAG 13280  
 13281 GATCAGAAACTTCAGAATATTTCTGGAGGTGAACCCATCTCGGGAGAGACACATCCTGACTGTGGAGCAGCCTAGGAAGA 13360  
 13361 TCCTTGGAGCAGCCCCAAGGGAGGCACTAACTTACACTACGGTATCAAGAATTTTTTCACTTATAAACAGGTCCTCGAC 13440

13441 GCAACATTAAGCAAATGTTGGAATGGGCCGGACCACAAGCTATCCCCCGTTCTACATTATCCCAAATGAACCTCCCTC 13520  
→ **Acc1 ORF**  
M N L P R

13521 GAACTAGTGGGCAGATCAAAAGAGGAGGAGCAACACAAGCTCCGCCCTAAGGAGGGCGCTGGTTCCCTATAAAACAGGC 13600  
T S G Q I K R G G A T Q A P P L R R A L V P Y K T G

13601 TGCGCTGAGACAAAAGAGGAACAACCCCACTGGACCTGGACGAAGACACAAGAAGAGGAACAACCTGCAGCATAACCATGGC 13680  
C A E T K E E Q P H W T W T K T Q E E E Q L Q H T M A

13681 TTCTACCCAGCTACCTACCACACCCGACGTAAGTCCCACTTTTAACTCATCCATGCAGCATAACCCGCTCACCCGAGACCCA 13760  
S T Q L P T T P D V S P T F N S S M Q H T R S P R P R

13761 GGGATCCTCCCTGGCTGTATCTCTGGTTGAATACTATGCGATAATGTTTGCATGGTTCTGTTACTGCATGACGGGGAAA 13840  
D P P L A V S L V E Y Y A I M F A W F C Y C M T G K

13841 TGGACTCTCAAGCAACCGTTGAGAATTCTTATCCTGGCCATGTCAATGGGTCAGGTTGCAGTTGGCCGCTTTTAGGCCG 13920  
W T L K Q P L R I L I L A M S M G Q V A V G R L L G R

13921 ACAAGAAGTCGCACTCTCCCTGTTCGTCTCCTACATCCTGGGGAGAGCGAAGCCACTGCAACCCCGGGCGGCTGCTTTAC 14000  
Q E V A L S L F V S Y I L G R A K P L Q P R A A A L L

14001 TTCTCTTATGGTTGCTTATTGAGTTCGTGGTAATAGGCATTGAATGGGTCAGACGAGCACCATTCTCCCGCTTTGCCCA 14080  
L L W L L I E F V V I G I E W V R R A P F S R F A P

14081 GAGTACATCATCCTGGCTGTCTGGGAAGGTATGCTGGCCATGAGTGTTCATCTTTGTTCATCGGTTCGTGAAACCTGCCGCAT 14160  
E Y I I L A V W E G M L A M S V I F V I G R E T C R I

14161 AACATGTGGGAAGGTGGCCTGGTTCCTTCGGTTCCTCCGCCTTGCTCTGTGGGGCATAGCCTGGGGCGTTTATTCAACTT 14240  
T C G K V A W F L R F L R L A L W G I A W G V Y S T L

14241 TATATTGGATGGGACTGATCAGCGAGTTGTCGATCCTTGCCTGGTTCATGACCTATGCTGCCCTCCTCCCTGTGGCTGTC 14320  
Y W M G L I S E L S I L A W F M T Y A A L L P V A V

14321 TCAGCTGAACAAGCCTCACTCGAACCACCTCCTCTTCTCCAAGAAACGCGCCGATCACCACCCAGCCTAGTAGAGCTCG 14400  
S A E Q A S L E P P P L P P R N A P I T T Q P S R A R

14401 GCCGCTCCAGCGCTGGGTTAATCCTCCCAATTTGCCTCCCTTCGATGCTTCTCTCTACCATAACTGCCCCATTCTCAAG 14480  
P L Q R W V N P P N L P P F D A S L Y H N C P H S Q D

**Acc1 ORF end** ↓

14481 ATGATTAATTTTTTTGCTTTTTGCTGCTTTTAAAGCCACATTTTTATGATTTTTATAATTTTTAAAGACATTTTTGATTTT 14560  
D \*

14561 TGATTTTGTGTTTTACTACAACCTATTGTTGCGTCTGGCGCTTTAAGTTGTAAAATGTTTTATGATCACTCCTAACCTCC 14640

14641 TTCACCCCTGTGTTCTGACAGGTACAACATTGTGCAGACTGCGGGAAAGGCTTGAGGGAGTTCCCATACCTTTGGGAATA 14720

14721 CCTCGGGGCTGCGTGGTGCCTCCATGCTACGCCTCCTACTTTGGAATCCCGGTGGCTACGGCCATCATACTGAGAGATG 14800

14801 GGATCCAAAGCTGCCCCCGAGCTGACTTCTCCCAAAGCCTCATGCTGCATAAGGATGGACAGATGGTCCACTGTACTCTA 14880  
→ **Acc2 ORF**  
M L H K D G Q M V H C T L

14881 CAGAACCCAAACCTTCCTGAACCCCTTGTACCTGTCAATGTTACCAGGCCTGTACCATCCCCCTCATCCAGAAGACCTG 14960  
 Q N P N L P E P L V P V N V H Q A C T I P L I Q K T W

14961 GAAATCTCTCTCCACTAACCGCAAGTATATCAGCCTTCATACCCCTGATTATGCTTTGGTGGATCTGTACATCAGCCAAC 15040  
 K S L S T N R K Y I S L H T P D Y A L V D L Y I S Q P

15041 CTGCTGAAGGAATGAGTACCGTGCAACAGGCGGTGGCCGACCTGCCGCGCCAGCACATCATGCCAGGGCCATCTCCAGAT 15120  
 A E G M S T V Q Q A V A D L P R Q H I M P G P S P D

15121 TCTATGACTGATCCTGCTCCTCAGGACATGTCATCACTGCAAGATGCCCTCCATGACCCCGACCTTATTGCTTGGCTGAA 15200  
 S M T D P A P Q D M S S L Q D A L H D P D L I A W L N

15201 TGATAATTCTAAGGATGTGCTGCCTCACGGCCCTGTACCAGCACTGGAGACCATCAATTTGGATCCACCTTCTCCAAGGT 15280  
 D N S K D V L P H G P V P A L E T I N L D P P S P R Y

15281 ACAGCCCATCCATGCCGGATCTCACCCCCACACGATCGCGGTGAGTGGCAGATACCCCTGCTGCAGACAATGCAGCCCTC 15360  
 S P S M P D L T P T R S R S V A D T P A A D N A A L

15361 CCCTCCCACCAGGCCCTACTGACCTACTGACCCTCTCCCCTGGTCCTTCTGACTTTGATCTCGAGCTGGCAGCTCCACG 15440  
 P S H Q A P T D L L T L S P G P S D F D L E L A A P R

15441 CCCCCATTGTCTGTAACCTACAGACACCCCCATCCTCGGCGTGTGGAAGAAAGCCGCCCTCTACCCCTATCAAGGCAC 15520  
 P P L S V T T D T P H P R R V E E S R P S T P I K A R

15521 GGTGGGCCCCGCCAGTTGCAGAAGAGAGCGTTGGGAAACGCTCCCCACGGGCCCCAGCACCTCTCACCAGAAGAAAGAG 15600  
 L G P P V A E E S V G K R S P P G P S T S H Q K K E

15601 TCCAGCACTGGCAGGACCTCATATGGAGCCGCGGTGGACAGGGCGGTAAAAACCTGGCATCAGCCTAAGGCCGAAGGGTA 15680  
 S S T G R T S Y G A A V D R A V K T W H Q P K A E G Y

15681 TGACAAAAGATACCGACCAAACAAGATGGGGCCCCCAAGGCCACACCTCCTTCACTCGGTGAGGACCCCTGCACCTC 15760  
 D K R Y R P N K M G P P K A H T S F T R S G P P A P R

15761 GTCCCATTACCCACCGTATGTCCCTGCCAAGATCCAACCATTGATCCCCCTGCTCTTCTTTCTCGGGCTCCTAGGCCT 15840  
 P H Y P P Y V P A K I Q P L I P P A L L S R A P R P

15841 GATTCCAAGGAGAGGGT**3' -LTR**GTCAAGAGACCCGACAGCTCCGGTCATCACTAGAATTGGAACCAGACCTATGGAGCCTTCACT 15920  
 D S K E R V S R D P T A P V I T R I G T R P M E P S L

15921 TGACCCCCAGCAGAGGAGGGAGTGTGACAGGAAAAGAAGCCACAGGAAGAATCGAGGTGAAGGCCGAGAAGAGAAGAAAA 16000  
 D P Q Q R R E C D R K R S H R K N R G E G R E E K K M

16001 TGAGGCGACAGGGAGGAGGTGAAATGATTTGAAGTTAATCAATTTTAATGCTGGCAAAAATACATATGTAACCTGAGTAA 16080  
**Acc2 ORF end** ◀  
 R R Q G G G E M I \*

16081 TGATTATGCTTAATTGCAATGTGAATGATTAATAATGTACTATGATGATTAATGTGTTTTCAAATGTAAAATGGTGATA 16160

16161 TAGAATAGAAAAGAATCAAAGTGTGTCCTAAGATGAAGGAAGGTTGTGTGTGTGTGCTGTTTTGGACGGTGAAAAGTACAG 16240

16241 GGCACATTTCTGGATAATAGGAAAAACAGATGTGTGGGCTTTTCTGGAATGTCCAGAGGCCCTGTGGTGAAAAACAAAG 16320

16321 TGGTTTTAACTCACCACAGAAAAGTCCCTAGCAGTCCCATAGCAGAAAGTCAGCAGGATTACCTCATTCTGGAAAAGTAC 16400

16401 AGAAAAACACATGATGGGAAGTCCCCACCCTTCCACAGAAAGGAAGGAGGGGGGGCGAACGAGCCCAGAAAGAGTATAAAA 16480

16481 GGCCAAGCAGTCCAGCAGTAAAGCGTCTTCTGGCCATCGACTGGAGAAGAAGCAGCAAGCAGCGAGGACATCGAGAGCAG 16560

16561 AGGAGCAAGCAGATCCGAAGATCATCTCATCTGGGGCAAGCTGACAGATTCCCCTCCGGCGATCTAAGGACCGAAGACCA 16640

16641 AATTGGACCCAGCCCAACTCTGAGAAGTTCTTTTCAGGCAACAATCTGATGCACCTCATGGGGGTAAAACCGACTGCTCT 16720

16721 AACCTGTCCTGCCGTCTCCAAATTAACAGAAAATGCCACACCACCTAATTAGAAAGATAGGTCAGCATATTAGAGCATTT 16800

16801 TATTTTTATCACCATCAATTATTAATCAATATTCTTAATCTGTATAATCAAATGTGGCTTTTCTTGCAAATTCCTATTAA 16880

16881 ACTGCTTACAGCATCATAAAGACAAATTCCTGACTGGACATTGATTTTTAAAGTTGTCCTTTAAAGTTTTTCTCTGATTA 16960

16961 CATGAGAGTTTTGTTACTGTAAAGCAACAAGGTAATAACATATTAAGAGTATGGTTGCTTTGAAGCCAAGAGGTAATAA 17040

17041 AATGAGGTCATAGATCACAAATAAGTTCATTTTTAATGGTTATTAACCTGGGGAGATAGGATAACTCCCCTTTAACAGTT 17120

17121 CCCTTGAGACCTATTGTACAGGTCACTAAATCTCATCTCGGCCACAACAAGAAGTGCACATCCTACGAGGGAGCGGCTGC 17200

17201 CAGGAACGATAGTGACCGGCAGATGGAGGCGTCTGAGCTACTACGCCGACCCAGAGGCCGGGGTTACGAAGGGAGCGA 17280

17281 CTACCGGAAGGAGGGCAGCTGGAGGTCGAGCTCAAGGCTCCCGCCTGATGCCTCCCGGAGGAGACACGTCAGACTCAGCC 17360

17361 ACACCGGTCACCCCCAGGTGGCTGTAAGTCTGGTCCATCGCCTCCAACCCAAGAGGGAGACATCGTCTCTCTCCAAGAC 17440

17441 CCACCAGTGTCCGAGTGGGTAAACTGGGGGAGGAGCCACAAAGGATTT**CA**

**Supplementary Figure 2 Detailed descriptions of FLERV genomes.** Four genomes were annotated in detail, including NviFLERV-1, NviFLERV-2, AciFLERV, and AliFLERV (from top to bottom). Protein open reading frame (ORF) locations were determined by sequence similarity to mammalian foamy viruses and based on the distribution of stop and start codons, determined by Open Reading Frame Finder. Primer binding sites (PBS), polypurine tracts (PPT), and central polypurine tracts (cPPT) are indicated by bold type and solid lines. Long terminal repeats (LTRs), Gag, Pol, Env, Acc1a, Acc1b, and Acc2 protein sequences are highlighted. Several conserved domains and catalytic centres are highlighted in darker colours. Putative insertion and deletion mutations are indicated by red dashes. The beginning and the end of ORFs are indicated by arrows and square-arrows, respectively.



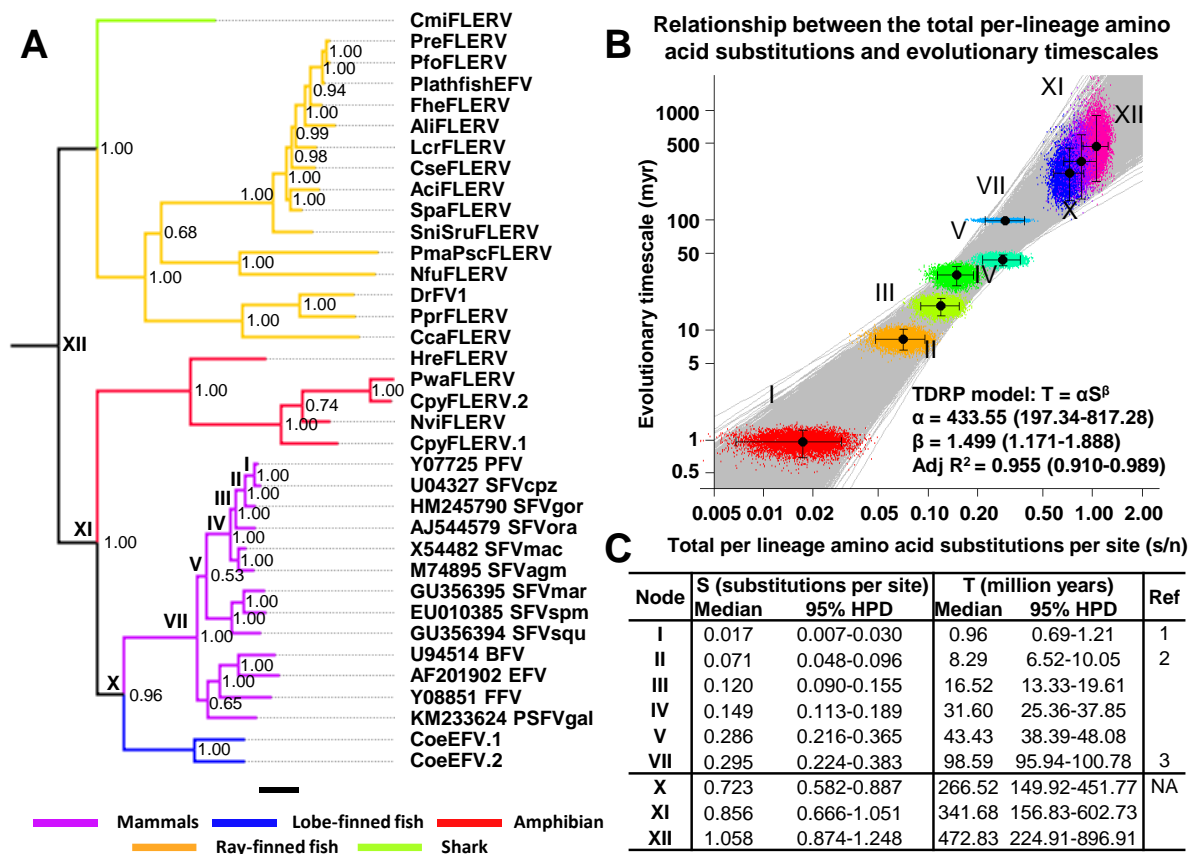

**Supplementary Figure 4 Phylogenetic analyses with maximum likelihood ancestral sequences. (A)** A Bayesian phylogeny of FV and maximum-likelihood ancestral sequences of FLERVs, rooted according to the tree in Fig. 3, left. Preceding FV names are accession numbers. Arabic numerals on nodes are Bayesian posterior probability node support values. Roman numerals indicate the nodes of which the total per-lineage substitutions to the chimpanzee simian FV (U14327 SFVcpz) were used to construct the time-dependent rate phenomenon (TDRP) model (see **B**). The numbers correspond to those in Fig. 3, left. The scale bar (solid black line, underneath the tree) represents genetic divergence of length 0.2 and is in units of amino-acid substitutions per site. **(B)** TDRP model and the timescales of FLERVs. The total per-lineage amino acid substitutions (S) from various nodes to SFVcpz are plotted against corresponding evolutionary timescales (T). The S and T estimates are labelled with Roman numerals, referring to nodes in **A**. Solid black dots are median estimates, and the associated 95% highest probability density (95% HPDs) intervals are indicated by error bars. The T estimates of node I-V, and VII were directly inferred from those of their hosts<sup>1-3</sup> (see **C**). 7,500 power-law TDRP models were fitted to the posterior distributions of the S and T estimates of the nodes I-V, and VII (grey lines). The median model parameter values, adjusted R<sup>2</sup> scores, and corresponding 95% HPDs (in the parentheses) are shown in the bottom right. The model was extrapolated to infer the branching date of lobe-finned fish FLERV lineage (node X), the separation date of salamander FLERV lineage (node XI), and the age of the entire FV/FLERV clade (node XII). **(C)** S estimates and T estimates used in the TDRP model reconstruction (above the line) and the inference of the timescales of FLERVs (below the line). The node numbers refer to those on the viral tree in **A**.

**Supplementary Table 1: Foamy virus-like reverse transcriptase nucleotide sequences retrieved from publically available nucleotide databases.**

| Accession no.  | Position*       | Species                          | Class          | Databases** |
|----------------|-----------------|----------------------------------|----------------|-------------|
| FS296312.1     | 128-748         | <i>Cynops pyrrhogaster</i>       | Amphibia       | est         |
| FS302975.1     | c447-1          | <i>Cynops pyrrhogaster</i>       | Amphibia       | est         |
| FS304159.1     | c407-3          | <i>Cynops pyrrhogaster</i>       | Amphibia       | est         |
| FS304221.1     | c407-3          | <i>Cynops pyrrhogaster</i>       | Amphibia       | est         |
| FS304248.1     | c407-3          | <i>Cynops pyrrhogaster</i>       | Amphibia       | est         |
| FS304312.1     | c407-3          | <i>Cynops pyrrhogaster</i>       | Amphibia       | est         |
| FS313726.1     | 31-578          | <i>Cynops pyrrhogaster</i>       | Amphibia       | est         |
| LE148026.1     | c4695-4291      | <i>Hynobius retardatus</i>       | Amphibia       | TSA         |
| LE148029.1     | c2990-2429      | <i>Hynobius retardatus</i>       | Amphibia       | TSA         |
| LE271194.1     | c707-273        | <i>Hynobius retardatus</i>       | Amphibia       | TSA         |
| JF490018.1     | c14498-13875    | <i>Notophthalmus viridescens</i> | Amphibia       | HTGS        |
| JF490018.1     | c1456-836       | <i>Notophthalmus viridescens</i> | Amphibia       | HTGS        |
| JG014957.1     | c583-134        | <i>Pleurodeles waltl</i>         | Amphibia       | est         |
| JG015238.1     | c753-224        | <i>Pleurodeles waltl</i>         | Amphibia       | est         |
| CX312570.1     | 90-620          | <i>Xenopus tropicalis</i>        | Amphibia       | est         |
| XM_007890932.1 | 329-958         | <i>Callorhynchus milii</i>       | Chondrichthyes | nr          |
| AAVX02007855.1 | 35070-35699     | <i>Callorhynchus milii</i>       | Chondrichthyes | wgs         |
| AAVX02008076.1 | 17550-18104     | <i>Callorhynchus milii</i>       | Chondrichthyes | wgs         |
| AAVX02021479.1 | c5271-4831      | <i>Callorhynchus milii</i>       | Chondrichthyes | wgs         |
| AAVX02030290.1 | 18590-19123     | <i>Callorhynchus milii</i>       | Chondrichthyes | wgs         |
| CCOE01000298.1 | 569-1215        | <i>Amphilophus citrinellus</i>   | Osteichthyes   | wgs         |
| CCOE01000352.1 | 308390-309034   | <i>Amphilophus citrinellus</i>   | Osteichthyes   | wgs         |
| CCOE01000398.1 | 23919-24563     | <i>Amphilophus citrinellus</i>   | Osteichthyes   | wgs         |
| CCOE01000548.1 | 20338-20976     | <i>Amphilophus citrinellus</i>   | Osteichthyes   | wgs         |
| CCOE01000821.1 | 6654-7292       | <i>Amphilophus citrinellus</i>   | Osteichthyes   | wgs         |
| CCOE01001074.1 | c15937-15281    | <i>Amphilophus citrinellus</i>   | Osteichthyes   | wgs         |
| CCOE01001468.1 | 1422655-1423299 | <i>Amphilophus citrinellus</i>   | Osteichthyes   | wgs         |
| CCOE01001819.1 | 51290-51934     | <i>Amphilophus citrinellus</i>   | Osteichthyes   | wgs         |
| CCOE01001827.1 | 10491-11135     | <i>Amphilophus citrinellus</i>   | Osteichthyes   | wgs         |
| CCOE01001950.1 | 28917-29553     | <i>Amphilophus citrinellus</i>   | Osteichthyes   | wgs         |
| CCOE01002087.1 | c18362-17724    | <i>Amphilophus citrinellus</i>   | Osteichthyes   | wgs         |
| CCOE01002093.1 | c11959-11348    | <i>Amphilophus citrinellus</i>   | Osteichthyes   | wgs         |
| CCOE01002105.1 | c19161-18517    | <i>Amphilophus citrinellus</i>   | Osteichthyes   | wgs         |
| CCOE01002121.1 | c10246-9602     | <i>Amphilophus citrinellus</i>   | Osteichthyes   | wgs         |
| CCOE01002123.1 | 12470-13081     | <i>Amphilophus citrinellus</i>   | Osteichthyes   | wgs         |
| CCOE01002125.1 | 8124-8764       | <i>Amphilophus citrinellus</i>   | Osteichthyes   | wgs         |
| CCOE01002130.1 | c12245-11601    | <i>Amphilophus citrinellus</i>   | Osteichthyes   | wgs         |
| CCOE01002251.1 | 2260-2904       | <i>Amphilophus citrinellus</i>   | Osteichthyes   | wgs         |
| CCOE01002262.1 | 4525-5169       | <i>Amphilophus citrinellus</i>   | Osteichthyes   | wgs         |
| CCOE01002516.1 | c11811-11167    | <i>Amphilophus citrinellus</i>   | Osteichthyes   | wgs         |
| CCOE01003376.1 | c7539-6895      | <i>Amphilophus citrinellus</i>   | Osteichthyes   | wgs         |
| CCOE01004540.1 | 553-1197        | <i>Amphilophus citrinellus</i>   | Osteichthyes   | wgs         |
| AWGY01041462.1 | c2004-1375      | <i>Anoplopoma fimbria</i>        | Osteichthyes   | wgs         |
| LDAR01045383.1 | 5236-5890       | <i>Austrofundulus limnaeus</i>   | Osteichthyes   | wgs         |
| LDAR01054356.1 | c1344-688       | <i>Austrofundulus limnaeus</i>   | Osteichthyes   | wgs         |
| LDAR01059718.1 | c5355-4702      | <i>Austrofundulus limnaeus</i>   | Osteichthyes   | wgs         |
| LDAR01064714.1 | 4570-4854       | <i>Austrofundulus limnaeus</i>   | Osteichthyes   | wgs         |
| LDAR01074257.1 | c34558-33913    | <i>Austrofundulus limnaeus</i>   | Osteichthyes   | wgs         |
| LDAR01076447.1 | c7566-6912      | <i>Austrofundulus limnaeus</i>   | Osteichthyes   | wgs         |
| LDAR01080842.1 | c3142-2487      | <i>Austrofundulus limnaeus</i>   | Osteichthyes   | wgs         |
| LDAR01084167.1 | 6421-7077       | <i>Austrofundulus limnaeus</i>   | Osteichthyes   | wgs         |

|                 |                    |                                |              |     |
|-----------------|--------------------|--------------------------------|--------------|-----|
| LDAR01086575.1  | c462-84            | <i>Austrofundulus limnaeus</i> | Osteichthyes | wgs |
| LDAR01088004.1  | 8364-9064          | <i>Austrofundulus limnaeus</i> | Osteichthyes | wgs |
| LDAR01099687.1  | c12143-11732       | <i>Austrofundulus limnaeus</i> | Osteichthyes | wgs |
| LDAR01103919.1  | c10461-9806        | <i>Austrofundulus limnaeus</i> | Osteichthyes | wgs |
| LDAR01108616.1  | c10961-10305       | <i>Austrofundulus limnaeus</i> | Osteichthyes | wgs |
| LDAR01109605.1  | 906-1562           | <i>Austrofundulus limnaeus</i> | Osteichthyes | wgs |
| LDAR01110171.1  | 5619-6273          | <i>Austrofundulus limnaeus</i> | Osteichthyes | wgs |
| LDAR01111596.1  | c4939-4289         | <i>Austrofundulus limnaeus</i> | Osteichthyes | wgs |
| LDAR01113167.1  | 2599-3256          | <i>Austrofundulus limnaeus</i> | Osteichthyes | wgs |
| LDAR01113985.1  | 3214-3483          | <i>Austrofundulus limnaeus</i> | Osteichthyes | wgs |
| LDAR01116364.1  | 6233-6883          | <i>Austrofundulus limnaeus</i> | Osteichthyes | wgs |
| LDAR01120049.1  | 9570-10592         | <i>Austrofundulus limnaeus</i> | Osteichthyes | wgs |
| LDAR01123043.1  | c9570-8914         | <i>Austrofundulus limnaeus</i> | Osteichthyes | wgs |
| LDAR01125316.1  | 605-1262           | <i>Austrofundulus limnaeus</i> | Osteichthyes | wgs |
| LDAR01127107.1  | 995-1645           | <i>Austrofundulus limnaeus</i> | Osteichthyes | wgs |
| LDAR01128274.1  | 10861-11112        | <i>Austrofundulus limnaeus</i> | Osteichthyes | wgs |
| LDAR01128742.1  | c710-318           | <i>Austrofundulus limnaeus</i> | Osteichthyes | wgs |
| LDAR01130590.1  | 3190-3845          | <i>Austrofundulus limnaeus</i> | Osteichthyes | wgs |
| AGRG01008745.1  | c6819-6179         | <i>Cynoglossus semilaevis</i>  | Osteichthyes | wgs |
| AGRG01061695.1  | 1422-2066          | <i>Cynoglossus semilaevis</i>  | Osteichthyes | wgs |
| LN590673.1      | c14574362-14573703 | <i>Cyprinus carpio</i>         | Osteichthyes | nr  |
| LN590686.1      | c11209149-11208547 | <i>Cyprinus carpio</i>         | Osteichthyes | nr  |
| LN590902.1      | c92822-92217       | <i>Cyprinus carpio</i>         | Osteichthyes | nr  |
| LN591772.1      | 78803-79403        | <i>Cyprinus carpio</i>         | Osteichthyes | nr  |
| LN592165.1      | c8233-7631         | <i>Cyprinus carpio</i>         | Osteichthyes | nr  |
| LN594197.1      | 561216-561659      | <i>Cyprinus carpio</i>         | Osteichthyes | nr  |
| LN594197.1      | 581455-582057      | <i>Cyprinus carpio</i>         | Osteichthyes | nr  |
| CAAK05043237.1  | c30960-30547       | <i>Danio rerio</i>             | Osteichthyes | wgs |
| CAAK05053864.1  | c19938-19492       | <i>Danio rerio</i>             | Osteichthyes | wgs |
| CABZ01012381.1  | c41144-40698       | <i>Danio rerio</i>             | Osteichthyes | wgs |
| CABZ01026504.1  | c11500-11186       | <i>Danio rerio</i>             | Osteichthyes | wgs |
| CABZ01041340.1  | c31043-30630       | <i>Danio rerio</i>             | Osteichthyes | wgs |
| CABZ01054182.1  | 53870-54316        | <i>Danio rerio</i>             | Osteichthyes | wgs |
| CABZ01059307.1  | c8345-7899         | <i>Danio rerio</i>             | Osteichthyes | wgs |
| CABZ01098205.1  | c3177-2731         | <i>Danio rerio</i>             | Osteichthyes | wgs |
| CZQB01082620.1  | c1695-1249         | <i>Danio rerio</i>             | Osteichthyes | wgs |
| CZQB01127375.1  | c17284-16871       | <i>Danio rerio</i>             | Osteichthyes | wgs |
| CZQB01170393.1  | 314-640            | <i>Danio rerio</i>             | Osteichthyes | wgs |
| LKPD01020285.1  | c16071-15658       | <i>Danio rerio</i>             | Osteichthyes | wgs |
| CBXY010016181.1 | 55744-55998        | <i>Dicentrarchus labrax</i>    | Osteichthyes | wgs |
| AZJR02000232.1  | 282450-283051      | <i>Esox lucius</i>             | Osteichthyes | wgs |
| JXMV01012181.1  | c3197-2559         | <i>Fundulus heteroclitus</i>   | Osteichthyes | wgs |
| JXMV01100753.1  | 9176-9808          | <i>Fundulus heteroclitus</i>   | Osteichthyes | wgs |
| CAEA01131311.1  | 6-536              | <i>Gadus morhua</i>            | Osteichthyes | wgs |
| CAEA01539013.1  | c3858-3220         | <i>Gadus morhua</i>            | Osteichthyes | wgs |
| JPYK01043025.1  | c1753-1184         | <i>Larimichthys crocea</i>     | Osteichthyes | wgs |
| JRPU01006056.1  | c71664-71026       | <i>Larimichthys crocea</i>     | Osteichthyes | wgs |
| JRPU01007253.1  | 7552-8190          | <i>Larimichthys crocea</i>     | Osteichthyes | wgs |
| JRPU01008437.1  | c27096-26458       | <i>Larimichthys crocea</i>     | Osteichthyes | wgs |
| JRPU01010616.1  | 45179-45817        | <i>Larimichthys crocea</i>     | Osteichthyes | wgs |
| JRPU01011225.1  | 4195-4833          | <i>Larimichthys crocea</i>     | Osteichthyes | wgs |
| JRPU01012463.1  | c2936-2298         | <i>Larimichthys crocea</i>     | Osteichthyes | wgs |
| JRPU01013645.1  | c5778-5140         | <i>Larimichthys crocea</i>     | Osteichthyes | wgs |
| JRPU01018720.1  | c9347-8778         | <i>Larimichthys crocea</i>     | Osteichthyes | wgs |



|                |              |                                      |              |     |
|----------------|--------------|--------------------------------------|--------------|-----|
| JRPU01021077.1 | c9543-8905   | <i>Larimichthys crocea</i>           | Osteichthyes | wgs |
| LBLR01010097.1 | c8752-8234   | <i>Lates calcarifer</i>              | Osteichthyes | wgs |
| GAIB01031349.1 | 757-1296     | <i>Nothobranchius furzeri</i>        | Osteichthyes | TSA |
| ABLO01001532.1 | c656-33      | <i>Nothobranchius furzeri</i>        | Osteichthyes | wgs |
| ACCZ01000769.1 | 37-660       | <i>Nothobranchius furzeri</i>        | Osteichthyes | wgs |
| JNBZ01063262.1 | 3578-4201    | <i>Nothobranchius furzeri</i>        | Osteichthyes | wgs |
| JNBZ01067388.1 | c1941-1342   | <i>Nothobranchius furzeri</i>        | Osteichthyes | wgs |
| JNBZ01070977.1 | 205-828      | <i>Nothobranchius furzeri</i>        | Osteichthyes | wgs |
| JNBZ01105729.1 | 807-1430     | <i>Nothobranchius furzeri</i>        | Osteichthyes | wgs |
| JNBZ01114434.1 | c1351-1037   | <i>Nothobranchius furzeri</i>        | Osteichthyes | wgs |
| JNBZ01114434.1 | c885-262     | <i>Nothobranchius furzeri</i>        | Osteichthyes | wgs |
| JNBZ01238562.1 | c630-7       | <i>Nothobranchius furzeri</i>        | Osteichthyes | wgs |
| AERX01018483.2 | c31806-31169 | <i>Oreochromis niloticus</i>         | Osteichthyes | wgs |
| JACM01000693.1 | 1447-1923    | <i>Periophthalmodon schlosseri</i>   | Osteichthyes | wgs |
| JACM01004568.1 | c8464-7963   | <i>Periophthalmodon schlosseri</i>   | Osteichthyes | wgs |
| JACM01028065.1 | c506-3       | <i>Periophthalmodon schlosseri</i>   | Osteichthyes | wgs |
| JACL01052273.1 | c2223-1576   | <i>Periophthalmus magnuspinnatus</i> | Osteichthyes | wgs |
| JNCD01010179.1 | 2919-3554    | <i>Pimephales promelas</i>           | Osteichthyes | wgs |
| JNCD01019993.1 | 49258-49905  | <i>Pimephales promelas</i>           | Osteichthyes | wgs |
| JNCD01029789.1 | 3921-4561    | <i>Pimephales promelas</i>           | Osteichthyes | wgs |
| JNCD01073002.1 | c7341-6694   | <i>Pimephales promelas</i>           | Osteichthyes | wgs |
| JNCE01099165.1 | 4812-5452    | <i>Pimephales promelas</i>           | Osteichthyes | wgs |
| JNCE01145994.1 | 7578-8225    | <i>Pimephales promelas</i>           | Osteichthyes | wgs |
| JNCE01342880.1 | 3061-3708    | <i>Pimephales promelas</i>           | Osteichthyes | wgs |
| JNCE01566843.1 | c497-3       | <i>Pimephales promelas</i>           | Osteichthyes | wgs |
| AYCK01020712.1 | 11627-12271  | <i>Poecilia formosa</i>              | Osteichthyes | wgs |
| AYCK01021113.1 | 4374-5018    | <i>Poecilia formosa</i>              | Osteichthyes | wgs |
| AYCK01021113.1 | 6552-7196    | <i>Poecilia formosa</i>              | Osteichthyes | wgs |
| AYCK01023761.1 | c12032-11373 | <i>Poecilia formosa</i>              | Osteichthyes | wgs |
| AYCK01024933.1 | c1579-935    | <i>Poecilia formosa</i>              | Osteichthyes | wgs |
| AYCK01026224.1 | c13615-12971 | <i>Poecilia formosa</i>              | Osteichthyes | wgs |
| AYCK01027102.1 | c10638-9994  | <i>Poecilia formosa</i>              | Osteichthyes | wgs |
| AYCK01029392.1 | 4062-4705    | <i>Poecilia formosa</i>              | Osteichthyes | wgs |
| AZHG01008165.1 | c9444-8800   | <i>Poecilia reticulata</i>           | Osteichthyes | wgs |
| AZHG01026008.1 | c1689-1071   | <i>Poecilia reticulata</i>           | Osteichthyes | wgs |
| AZHG01027173.1 | 4486-5013    | <i>Poecilia reticulata</i>           | Osteichthyes | wgs |
| AZHG01028727.1 | c16211-15567 | <i>Poecilia reticulata</i>           | Osteichthyes | wgs |
| AZHG01031876.1 | 3998-4642    | <i>Poecilia reticulata</i>           | Osteichthyes | wgs |
| AZHG01037968.1 | c638-3       | <i>Poecilia reticulata</i>           | Osteichthyes | wgs |
| AUPR01019601.1 | 4426-5079    | <i>Sebastes nigrocinctus</i>         | Osteichthyes | wgs |
| AUPQ01030678.1 | c8375-7722   | <i>Sebastes rubrivinctus</i>         | Osteichthyes | wgs |
| JMKM01038484.1 | c2396-1752   | <i>Stegastes partitus</i>            | Osteichthyes | wgs |
| JMKM01039462.1 | c1764-1129   | <i>Stegastes partitus</i>            | Osteichthyes | wgs |
| JMKM01039980.1 | 8626-9270    | <i>Stegastes partitus</i>            | Osteichthyes | wgs |
| BADN01112239.1 | 502-1138     | <i>Thunnus orientalis</i>            | Osteichthyes | wgs |
| BADN01125085.1 | 882-1301     | <i>Thunnus orientalis</i>            | Osteichthyes | wgs |
| AGAJ01031885.1 | 2681-3136    | <i>Xiphophorus maculatus</i>         | Osteichthyes | wgs |
| AGAJ01039643.1 | 21494-21946  | <i>Xiphophorus maculatus</i>         | Osteichthyes | wgs |
| AGAJ01041163.1 | c9244-8789   | <i>Xiphophorus maculatus</i>         | Osteichthyes | wgs |
| AGAJ01045326.1 | c9270-8815   | <i>Xiphophorus maculatus</i>         | Osteichthyes | wgs |
| AGAJ01045559.1 | 4290-4745    | <i>Xiphophorus maculatus</i>         | Osteichthyes | wgs |
| AGAJ01047098.1 | 715-1170     | <i>Xiphophorus maculatus</i>         | Osteichthyes | wgs |
| AGAJ01049791.1 | c1128-673    | <i>Xiphophorus maculatus</i>         | Osteichthyes | wgs |
| AGAJ01050163.1 | c1105-650    | <i>Xiphophorus maculatus</i>         | Osteichthyes | wgs |

|                |              |                              |               |     |
|----------------|--------------|------------------------------|---------------|-----|
| AGAJ01050296.1 | 4013-4468    | <i>Xiphophorus maculatus</i> | Osteichthyes  | wgs |
| AGAJ01052256.1 | 247-702      | <i>Xiphophorus maculatus</i> | Osteichthyes  | wgs |
| AGAJ01053413.1 | 281-736      | <i>Xiphophorus maculatus</i> | Osteichthyes  | wgs |
| GAPS01007249.1 | 313-729      | <i>Latimeria menadoensis</i> | Sarcopterygii | TSA |
| AFYH01036414.1 | c700-254     | <i>Latimeria chalumnae</i>   | Sarcopterygii | wgs |
| AFYH01178313.1 | c4935-4489   | <i>Latimeria chalumnae</i>   | Sarcopterygii | wgs |
| AFYH01184753.1 | c1256-807    | <i>Latimeria chalumnae</i>   | Sarcopterygii | wgs |
| AFYH01210236.1 | 8698-9144    | <i>Latimeria chalumnae</i>   | Sarcopterygii | wgs |
| AFYH01247568.1 | c3914-3468   | <i>Latimeria chalumnae</i>   | Sarcopterygii | wgs |
| BAHO01057271.1 | c5029-4586   | <i>Latimeria chalumnae</i>   | Sarcopterygii | wgs |
| BAHO01073407.1 | 1167-1613    | <i>Latimeria chalumnae</i>   | Sarcopterygii | wgs |
| BAHO01074903.1 | c5564-5118   | <i>Latimeria chalumnae</i>   | Sarcopterygii | wgs |
| BAHO01088137.1 | c4040-3594   | <i>Latimeria chalumnae</i>   | Sarcopterygii | wgs |
| BAHO01107246.1 | c7021-6575   | <i>Latimeria chalumnae</i>   | Sarcopterygii | wgs |
| BAHO01122095.1 | c1008-562    | <i>Latimeria chalumnae</i>   | Sarcopterygii | wgs |
| BAHO01123364.1 | c6228-5782   | <i>Latimeria chalumnae</i>   | Sarcopterygii | wgs |
| BAHO01124408.1 | 2691-3137    | <i>Latimeria chalumnae</i>   | Sarcopterygii | wgs |
| BAHO01126659.1 | 7079-7525    | <i>Latimeria chalumnae</i>   | Sarcopterygii | wgs |
| BAHO01131885.1 | c1942-1496   | <i>Latimeria chalumnae</i>   | Sarcopterygii | wgs |
| BAHO01162318.1 | 8104-8550    | <i>Latimeria chalumnae</i>   | Sarcopterygii | wgs |
| BAHO01174129.1 | 2133-2579    | <i>Latimeria chalumnae</i>   | Sarcopterygii | wgs |
| BAHO01177875.1 | 19240-19686  | <i>Latimeria chalumnae</i>   | Sarcopterygii | wgs |
| BAHO01190208.1 | c22322-21873 | <i>Latimeria chalumnae</i>   | Sarcopterygii | wgs |
| BAHO01198287.1 | c7041-6595   | <i>Latimeria chalumnae</i>   | Sarcopterygii | wgs |
| BAHO01243374.1 | c604-158     | <i>Latimeria chalumnae</i>   | Sarcopterygii | wgs |
| BAHO01244829.1 | c1902-1456   | <i>Latimeria chalumnae</i>   | Sarcopterygii | wgs |
| BAHO01246974.1 | 7936-8379    | <i>Latimeria chalumnae</i>   | Sarcopterygii | wgs |
| BAHO01312704.1 | c3294-2848   | <i>Latimeria chalumnae</i>   | Sarcopterygii | wgs |
| BAHO01321068.1 | 23843-24289  | <i>Latimeria chalumnae</i>   | Sarcopterygii | wgs |
| BAHO01335329.1 | c774-328     | <i>Latimeria chalumnae</i>   | Sarcopterygii | wgs |
| BAHO01387613.1 | 9178-9624    | <i>Latimeria chalumnae</i>   | Sarcopterygii | wgs |
| BAHO01391119.1 | 23461-23907  | <i>Latimeria chalumnae</i>   | Sarcopterygii | wgs |
| BAHO01395088.1 | c2134-1688   | <i>Latimeria chalumnae</i>   | Sarcopterygii | wgs |
| BAHO01407282.1 | c2606-2160   | <i>Latimeria chalumnae</i>   | Sarcopterygii | wgs |

\*the letter 'c' indicates complementary sequences.

\*\* 'nr' = non-redundant nucleotide sequences; 'est' = expressed sequence tags; 'HTGS' = high throughput genomic sequences; 'wgs' = whole genome shotgun sequences; and 'TSA' = transcriptome shotgun assembly sequences.

## Supplementary Note 1 Detailed genomic annotations of FLERVs

Four genomes were annotated in detail, including NviFLERV-1, NviFLERV-2, AciFLERV, and AliFLERV.

### NviFLERV-1

NviFLERV-1 is a full-length endogenous retroviral element (9,200 nucleotides (nt)). It was found in the genome of eastern newt (*Notophthalmus viridescens*) on the contig JF490018, locating at the nt position c17,626 to c8,434. (The nt positions are with respect to the contig length; the letter 'c' indicates that the element is characterised on the complementary sequence.) By blasting NviFLERV-1 against itself, we were able to locate its 5'- and 3'-long terminal repeat (LTR) to be at the nt position c17,626-16,667 (960 nt) and c9,407-8,434 (974 nt), respectively. Target site duplications (TSDs) were also found (5'-GAGT-3'), flanking NviFLERV-1. Situated on the 3' end of the 5'-LTR is a tRNA<sup>Asn</sup>-utilising putative primer binding site (PBS), identified via sequence homology to be at the nt position c16,673-16,692 (TACCCAACGTGG). This is similar to the PBS utilised by prosimian galago foamy virus, but differs from those of other mammalian foamy viruses (FVs), which are tRNA<sup>Lys</sup>-utilising PBSs. The putative *gag*, *pol*, and *env* genes were predicted to be at the nt position c16,368-14,859 (1,510 nt), c14,983-11,458 (3,526 nt), c11,467-10,041 (1,427 nt), respectively, identified by sequence similarity to those of simian FVs (SFVs). Several in-frame stop codons and frameshift mutations were found, indicative of the defective nature of NviFLERV-1, typical for an ERV. We could also locate (defective) polypurine tracts (PPT) for the dual initiation of plus-stand DNA synthesis to be on the 5' boundary of the 3'-LTR (GATCTTAGGGGGG; nt c9,420-9,408) and at the centre of the genome toward the 3' terminus of *pol* gene (GAGTCCCTGGGGG; nt c12,103-12,091) as anticipated. The putative Gag (503 aa), Pol (1,176 aa), and Env (475 aa) proteins are most similar to the Gag (BLASTp best hit: AIM40342;  $E = 1 \times 10^{-14}$ ), Pol (BLASTp best hit: ABV59399;  $E = 2 \times 10^{-130}$ ), and Env (BLASTp best hit: AKM21186;  $E = 4 \times 10^{-8}$ ) proteins of SFVs, confirming that it is FV-like. We however noted that the predicted Env protein of NviFLERV-1 (475 aa) is much shorter than those of mammalian FVs (~985 aa). Sequence investigation revealed that the N-terminus was missing. This could be due to host genomic deletion or a genuine absence of the sequence. Exogenous viral counterparts are needed for further examination. Within the Pol putative protein, we were able to locate the reverse transcriptase (aa 163-360; the amino acid positions are with respect to the length of the putative Pol protein), RNaseH (aa 594-739), and integrase core domain (aa 877-988). An aspartic protease domain, which exists in all mammalian FV Pol, could not be found however. Between the *env* and 3'-LTR is a stretch of uniquely-mapping 492 nt (nt c10,048-9,557). BLASTx showed that it exhibits some similarity to a gene of Porcine reproductive and respiratory syndrome virus (BLASTx: AEQ61854;  $E = 6 \times 10^{-4}$ ). In mammalian FVs, this region contains accessory genes (*bel1* and *bel2*). Given its position and the fact that it exhibits some similarity to a viral gene, we believe that it is likely an accessory gene. We in turn designated it an '*acc*' gene. To examine whether or not it is indeed an accessory gene, exogenous viral counterparts are required.

### NviFLERV-2

NviFLERV-2 is a truncated element (4,391 nt), discovered in the genome of eastern newt (*N. viridescens*) on the same contig that NviFLERV-1 was found (JF490018). For NviFLERV-2, we identified the following features via sequence homology; i) a tRNA<sup>Asn</sup>-utilising PBS (TGGCGCCCCAA; nt c3,734-3,714) similar to that of NviFLERV-1, ii) a complete putative *gag* gene (nt c3,401-1,821, 1,581 nt), and iii) a partial *pol* gene (nt c1,945-1, 1,945 nt). By using the LTR of NviFLERV-1 as a probe, we were able to locate the (5' truncated) 5'-LTR of NviFLERV-2 to be at the nt position c4,391-3,735 (656 nt). Similar to those of NviFLERV-1, the putative Gag (526 aa) and Pol (648 aa) proteins of NviFLERV-2 are most similar to the Gag (BLASTp best hit: ADE05994,  $E = 2 \times 10^{-18}$ ) and Pol (BLASTp best hit: ABV59399,  $E = 1 \times 10^{-98}$ ) of SFVs, respectively. Within the putative Pol protein, we located the reverse transcriptase, and (partial) RNaseH domain to be at aa 188-361, and 592-647,

respectively. In contrast to NviFLERV-1, NviFLERV-2 *gag* and *pol* genes do not seem to contain any in-frame stop codon or frameshift mutations.

## AciFLERV

9 elements of AciFLERVs were found in the genome of midas cichlid (*Amphilophus citrinellus*), allowing us to construct their ancestral sequence for better genomic annotation. The original elements contain numerous in-frame stop codon and frameshift mutations as well as transposable elements and large insertion-deletion mutations, strongly supporting that they are indeed ERVs. The maximum-likelihood ancestral sequence of AciFLERV is 17,409 nt long, much longer than the length of mammalian FVs ~10kb. By investigating the distribution of start and stop codons, we determined AciFLERV to have 8 open reading frames (ORFs; ORF-1 to -8, from the 5' end of the genome). Again, this is also very different from the typical genomic structure of mammalian FVs, which has only 5 ORFs, including (from the 5' end) *gag*, *pol*, and *env* genes followed by two accessory genes *bel1*, and *bel2*.

We found that the LTRs of AciFLERV are 1,498 nt long (5'-LTR: nt 1-1,498; 3'-LTR: nt 15,912-17,409), and for those with paired LTRs, we were able to identify their TSDs to be 5'-GAAG-3' (CCOE01001074), 5'-GTGT-3' (CCOE01000352), 5'-CAGC-3' (CCOE01001468), and 5'-CTGG-3' (CCOE01000548). On the 3' end of the 5'-LTR is a tRNA<sup>Lys</sup>-utilising PBS (TGGCGCCCAACGTGGGGC; nt 1,501-1,518), similar to those utilised by most mammalian FVs. Our analyses revealed that none of the putative proteins translated from the 8 ORFs exhibit strong similarities to known viral proteins, except for the one derived from ORF-2 (nt 5,220-8,432, 3,213 nt), showing a strong similarity to the Pol protein of equine FV (BLASTp best hit: NP054716; E =  $6 \times 10^{-33}$ ). We thus designated ORF-2 a *pol* gene. The putative Pol protein contains the aspartic protease (aa 122-193), reverse transcriptase (aa 208-385), RNaseH (aa 608-743), and integrase (aa 839-952) core domain, as is typical of a FV Pol protein. Based on our knowledge of FV genomic structure, we believe that ORF-1 (nt 1,879-5,220, 3,342 nt), which locates on the 5' end of the *pol* gene, is likely a *gag* gene, and together with manual sequence inspection, that ORF-5 (nt 10,889-13,222, 2,334 nt) is likely an *env* gene. Indeed, we observed a weak, but detectable, similarity between the C terminus of the putative protein derived from ORF-5 and SFV Env proteins (BLASTp best hit: AAA47801; E = 0.94), supporting the *env* gene annotation. According to the typical genomic structure of FVs, this in turn makes ORF-6 (nt 13,252-14,010, 759 nt), ORF-7 (nt 14,249-15,001, 753 nt), and ORF-8 (nt 15,173-15,874, 702 nt) likely accessory genes. Further inspection revealed that ORF-6 and ORF-7 proteins are highly similar to one another (BLASTp: E =  $1 \times 10^{-26}$ ), strongly indicating that they are paralogous. We thus annotated ORF-6, -7, and -8 an '*acc1a*' gene, an '*acc1b*' gene, and an '*acc2*' gene, respectively.

Regarding ORF-3 (nt 8,454-9,848, 1,395 nt) and ORF-4 (nt 9,824-10,825, 1,002 nt), since their proteins do not exhibit strong similarity to any known viral proteins, and their positions do not correspond to any known FV genes, it is still unclear what they are. It is also possible that they might actually be parts of the *pol* and *env* genes, but falsely annotated as separate individual ORFs due to errors in the ancestral sequence reconstruction. However, since the lengths of the predicted Pol and Env proteins of AciFLERV (1,070 and 777 aa, respectively) are already comparable to those of mammalian FVs (~1,150 aa, and ~985 aa, respectively), we believe that this is unlikely. Additionally, we found that contigs that contain these 2 ORFs tend to also contain *gag*, *pol* and/or *env* genes, strongly supporting that they indeed have viral origins, likely existing in the progenitor of AciFLERV. Furthermore, although mammalian FVs do not possess accessory genes between *pol* and *env* genes, other retroviruses do. For example, the lentiviral human immunodeficiency virus contains three accessory genes in this region, namely *vif*, *vpr*, and *vpu*, which are essential for the viral replication, assembly, and release. We thus believe that ORF-3 and ORF-4 are likely viral accessory genes, and designated them '*acc3*' and '*acc4*', respectively.

## AliFLERV

23 AliFLERVs were found in the genome of annual killifish (*Austrofundulus limnaeus*), allowing their ancestral sequence to be reconstructed for better genomic annotation. Similar to AciFLERVs, the original elements contain numerous in-frame stop codon and frameshift mutations as well as transposable elements and large insertion-deletion mutations, strongly supporting that they are ERVs. The inferred ancestral sequence of AliFLERV is 17,490 nt long, and by inspecting the distribution of start and stop codons, we found that AliFLERV has 6 ORFs. Again, similar to AciFLERV, AliFLERV is much longer than typical mammalian FVs, and its genomic structure is also very different from those of mammalian FVs.

By BLASTing the sequence against itself, we determined its LTRs to be 1,634 nt long (5'-LTR: nt 1-1,634; 3'-LTR: nt 15,857-17,490), slightly longer than those of AciFLERV. For one of the two elements that has paired LTRs, we found its TSDs to be 5'-ATA[C|A]-3' (LDAR01108616). The TSDs of the other element could not be identified as the contig that harbours the element (LDAR01045383) does not contain complete LTRs (i.e. the 5' end of the 5' LTR and the 3' end of the 3' LTR are missing). A tRNA<sup>lys</sup>-utilising PBS (TGGTGCCCAACGTGGGGC; nt 1,635-1,652) was identified after the 5'-LTR as anticipated via sequence homology, similar to those of most mammalian FVs and AciFLERV. As observed in the case of AciFLERV, none of the putative proteins derived from the 6 ORFs exhibit strong similarities to known viral proteins, except for the one derived from ORF-2 (nt 5,188-8,403, 3,216 nt), showing a strong similarity to the Pol protein of equine FV (BLASTp best hit: NP054716; E =  $6 \times 10^{-97}$ ). Hence, we designated AliFLERV ORF-2 a *pol* gene. The putative Pol protein of AliFLERV is highly similar to that of AciFLERV (BLASTp: E = 0, query cover = 99%), containing the protease (aa 120-193), reverse transcriptase (aa 206-383), RNaseH (aa 609-749), and integrase (aa 837-954) core domain. To annotate the rest of the genome, we transferred the gene annotation from AciFLERV to AliFLERV via protein sequence similarity. Our analyses suggest that ORF-1 (nt 1,955-5,191, 3,237 nt), ORF-4 (nt 10,120-12,501, 2,382 nt), and ORF-5 (nt 13,508-14,488, 981 nt) are *gag* gene (BLASTp: E <  $3 \times 10^{-113}$ , query cover > 87%), *env* gene (BLASTp: E =  $2 \times 10^{-107}$ , query cover = 94%), and *acc1* gene (Acc1a BLASTp: E =  $9 \times 10^{-18}$ , query cover = 81%; Acc1b BLASTp: E =  $2 \times 10^{-12}$ , query cover = 85%), respectively. Although we could not detect a significant similarity between AciFLERV *acc2* gene and AliFLERV ORF-6, we believe that AliFLERV ORF-6 is likely a *acc2* gene according to its position. Finally, our analyses mapped AciFLERV *acc3* to AliFLERV ORF-3 with a high confidence (nt 8,454-9,848; BLASTp: E =  $8 \times 10^{-113}$ , query cover = 90%), and the lengths of the two ORFs are also highly similar (AciFLERV ORF-3: 1,395 nt; AliFLERV ORF-3: 1,424 nt). We therefore annotated ORF-3 as an *acc3* gene.

## Supplementary references

1. Stone, A. C. *et al.* More reliable estimates of divergence times in Pan using complete mtDNA sequences and accounting for population structure. *Philos. Trans. R. Soc. Lond. B. Biol. Sci.* **365**, 3277–3288 (2010).
2. Perelman, P. *et al.* A molecular phylogeny of living primates. *PLoS Genet.* **7**, e1001342 (2011).
3. Bininda-Emonds, O. R. P. *et al.* The delayed rise of present-day mammals. *Nature* **446**, 507–512 (2007).
